# Supplementary material for: Associations of particulate matter with dementia and mild cognitive impairment in China: A multicenter cross-sectional study
Source: PubMed Central journal article supplement — Innovation (Camb). 2021 Jul 21;2(3):100147. doi: 10.1016/j.xinn.2021.100147 (PMC8454741; doi:10.1016/j.xinn.2021.100147), 2021-07-21
Supplement: mmc1.pdf [file mmc1.pdf]

**The Innovation, Volume 2**

**Supplemental Information**

**Associations of particulate matter**

**with dementia and mild cognitive impairment in China:**

**A multicenter cross-sectional study**

**Jiping Tan, Nan Li, Xiaoxiao Wang, Gongbo Chen, Lailai Yan, Luning Wang, Yiming Zhao, Shanshan Li, and Yuming Guo**

## Supplementary Material

### Estimating concentrations of PM<sub>2.5</sub> and PM<sub>10</sub>

#### *a. Data downloading and processing*

Daily concentrations of PM<sub>2.5</sub> and PM<sub>10</sub> over China during 2005-2016 were estimated using MODIS AOD, meteorological data, land use information and other predictors. More details about the data downloading and processing were previously reported (Chen et al., 2018a; Chen et al., 2018b). Daily ground measurements of PM<sub>2.5</sub> and PM<sub>10</sub> were obtained from 1479 stations of the China National Environmental Monitoring Center (CNEMC) from May 2014 to December 2016.

#### *b. Model development*

We used a machine learning method (random forests) for model development and prediction. This method is user-friendly, as there is no need to define the complex relationships between predictors (e.g., linear or nonlinear relationships and interactions) and the variable importance measures provided by random forests help user to identify important variables and noise variables (Hu et al., 2017). The final model is shown as following:

$$PM_{ij} = AOD_{ij} + TEMP_{ij} + RH_{ij} + BP_{ij} + WS_{ij} + NDVI + Urban\_cover + doy + \log(elev)$$

where  $PM_{2.5ij}$  is the PM<sub>2.5</sub> or PM<sub>10</sub> on day  $i$  at station  $j$ ;  $AOD_{ij}$  is the combined AOD;  $TEMP$ ,  $RH$ ,  $BP$  and  $WS$  are mean temperature, relative humidity, barometric pressure and wind speed on day  $i$ , respectively;  $NDVI$  is the monthly average NDVI value;  $Urban\_cover$  is the percentage of urban cover with a buffer radius of 10 km;  $doy$  is day of the year;  $\log(elev)$  is the log transformed elevation.

#### *c. Model validation and prediction*

To evaluate the predictive ability of the final model, a 10-fold cross-validation (CV) was performed. The results are shown in Table S1.

**Table S1. Results of 10-fold cross-validation for PM<sub>1</sub>, PM<sub>2.5</sub>, PM<sub>10</sub> and NO<sub>2</sub>**

| Pollutants        | Daily model       |                        | Annual averages   |                        |
|-------------------|-------------------|------------------------|-------------------|------------------------|
|                   | CV R <sup>2</sup> | RMSE                   | CV R <sup>2</sup> | RMSE                   |
| PM <sub>2.5</sub> | 83%               | 18.1 µg/m <sup>3</sup> | 86%               | 6.9 µg/m <sup>3</sup>  |
| PM <sub>10</sub>  | 78%               | 31.5 µg/m <sup>3</sup> | 81%               | 14.4 µg/m <sup>3</sup> |

The final random forests models were used to predict daily concentration of air pollutants in China. A 0.1-degree ( $\approx 10$  km) grid (including around 96,103 grid cells) covering the entire China was created for data integration and prediction. Daily concentrations of PM<sub>2.5</sub> and PM<sub>10</sub> were estimated for each grid cell during the study period. Predicted daily concentrations were aggregated into annual averages.

**References:**

- Chen, G., Knibbs, L.D., Zhang, W., Li, S., Cao, W., Guo, J., Ren, H., Wang, B., Wang, H., Williams, G., Hamm, N.A.S., Guo, Y., 2018a. Estimating spatiotemporal distribution of PM1 concentrations in China with satellite remote sensing, meteorology, and land use information. *Environmental Pollution* 233, 1086-1094.
- Chen, G., Li, S., Knibbs, L.D., Hamm, N.A.S., Cao, W., Li, T., Guo, J., Ren, H., Abramson, M.J., Guo, Y., 2018b. A machine learning method to estimate PM2.5 concentrations across China with remote sensing, meteorological and land use information. *Science of the Total Environment* 636, 52-60.
- Hu, X., Belle, J.H., Meng, X., Wildani, A., Waller, L., Strickland, M., Liu, Y., 2017. Estimating PM2.5 Concentrations in the Conterminous United States Using the Random Forest Approach. *Environ Sci Technol*.

**Supplementary Tables and Figures****Table S2 . The comparison about the prevalence of dementia of Chinese male veterans (our study) and ordinary population**

|       | Prevalence of dementia of ordinary population (%) | Number of male veterans | Expected number of dementia veterans | Observed number of dementia veterans |
|-------|---------------------------------------------------|-------------------------|--------------------------------------|--------------------------------------|
| 60-64 | 1.35                                              | 40                      | 1                                    | 0                                    |
| 65-69 | 2.58                                              | 45                      | 1                                    | 0                                    |
| 70-74 | 4.76                                              | 109                     | 5                                    | 4                                    |
| 75-79 | 8.5                                               | 1830                    | 156                                  | 94                                   |
| 80-84 | 14.63                                             | 3501                    | 512                                  | 459                                  |
| 85-89 | 24.32                                             | 1246                    | 303                                  | 295                                  |
| 90-94 | 39.03                                             | 179                     | 70                                   | 60                                   |
| >=95  | 60.47                                             | 20                      | 12                                   | 9                                    |
| Total | —                                                 | 6970 <sup>a</sup>       | 1060                                 | 921                                  |

<sup>a</sup>: The age data of 70 participants were missing. Data from 6,970 male veterans were included in the analysis after these missing data were excluded.

**Table S3. A summary of included and excluded participants' exposure to PM<sub>2.5</sub> and PM<sub>10</sub> (µg/m<sup>3</sup>) during the three years prior to the survey.**

| Pollutants        | Participants | n    | Mean   | Min   | Percentiles |        |        | Max    | SMD <sup>a</sup> |
|-------------------|--------------|------|--------|-------|-------------|--------|--------|--------|------------------|
|                   |              |      |        |       | 25%         | 50%    | 75%    |        |                  |
| PM <sub>2.5</sub> | Included     | 7040 | 56.92  | 30.46 | 48.15       | 55.21  | 71.46  | 84.23  | 0.036            |
|                   | Excluded     | 2636 | 56.44  | 30.46 | 47.04       | 54.89  | 66.13  | 84.23  |                  |
| PM <sub>10</sub>  | Included     | 7040 | 102.71 | 53.38 | 83.68       | 100.16 | 128.34 | 143.14 | 0.094            |
|                   | Excluded     | 2636 | 100.43 | 53.38 | 83.05       | 100.15 | 122.31 | 143.14 |                  |

**a: standardised mean difference between included and excluded participants.**

**Table S4 (single-pollutant model). The ORs (and 95% CIs) of MCI and dementia associated with per 10 µg/m<sup>3</sup> increase in PM.**

|                                   | MCI               | Dementia          |
|-----------------------------------|-------------------|-------------------|
| PM <sub>2.5</sub> <sup>a</sup>    | 1.52 (1.39, 1.67) | 1.27 (1.11, 1.46) |
| PM <sub>10</sub> <sup>a</sup>     | 1.04 (1.00, 1.08) | 1.13 (1.05, 1.21) |
| PM <sub>10-2.5</sub> <sup>a</sup> | 0.88 (0.84, 0.93) | 1.12 (1.01, 1.23) |

<sup>a</sup>: Adjusted for age, education years, smoking, drinking, family history of dementia, and history of NCDs. And city was modeled as random effect.

**Table S5 (two-pollutant model). The ORs (and 95% CIs) of MCI and dementia associated with per 10 µg/m<sup>3</sup> increase in PM and per 1 % increase in PM<sub>2.5</sub> / PM<sub>10</sub> ratio.**

|                                     | MCI               | Dementia          |
|-------------------------------------|-------------------|-------------------|
| PM <sub>10</sub>                    | 1.19 (1.13, 1.25) | 1.16 (1.07, 1.25) |
| PM <sub>2.5</sub> /PM <sub>10</sub> | 2.13 (1.86, 2.44) | 1.15 (0.96, 1.39) |

Adjusted for age, education years, smoking, drinking, family history of dementia, and history of NCDs. And city was modeled as random effect.

**Table S6. Male veterans participating in the CVCR Platform**

| Cities       | Male veterans screened | Included in this study |
|--------------|------------------------|------------------------|
| Beijing      | 1234                   | 1008                   |
| Shijiazhuang | 1011                   | 837                    |
| Dalian       | 881                    | 567                    |
| Lanzhou      | 447                    | 394                    |
| Yantai       | 457                    | 341                    |
| Qingdao      | 589                    | 492                    |
| Fuzhou       | 488                    | 457                    |
| Chengdu      | 493                    | 405                    |
| Guangzhou    | 530                    | 423                    |
| Wuhan        | 147                    | 111                    |

|          |      |      |
|----------|------|------|
| Shanghai | 720  | 416  |
| Xi 'an   | 677  | 537  |
| Tianjin  | 385  | 218  |
| Baoding  | 201  | 155  |
| Hohhot   | 189  | 175  |
| Taiyuan  | 254  | 197  |
| Guiyang  | 216  | 165  |
| Harbin   | 177  | 142  |
| Total    | 9096 | 7040 |

**Table S7. The ORs (and 95% CIs) of MCI and dementia associated with personal hobbies**

| Personal hobbies                  | MCI              |              | Dementia         |                  |
|-----------------------------------|------------------|--------------|------------------|------------------|
|                                   | OR (95% CI)      | P            | OR (95% CI)      | P                |
| Calligraphy                       | 0.87 (0.74,1.03) | 0.105        | 0.89 (0.66,1.20) | 0.442            |
| Painting                          | 1.24 (0.98,1.56) | 0.077        | 1.16 (0.75,1.81) | 0.510            |
| Photography                       | 0.81 (0.65,1.02) | 0.067        | 0.78 (0.50,1.24) | 0.296            |
| Collecting                        | 0.79 (0.63,1.00) | <b>0.045</b> | 0.65 (0.40,1.05) | 0.077            |
| Gardening                         | 1.10 (0.96,1.25) | 0.174        | 0.71 (0.57,0.90) | <b>0.005</b>     |
| Pet keeping                       | 1.17 (0.99,1.38) | 0.069        | 1.14 (0.83,1.55) | 0.420            |
| Handicraft                        | 0.66 (0.47,0.92) | <b>0.015</b> | 0.61 (0.32,1.15) | 0.125            |
| Reading                           | 0.71 (0.54,0.94) | <b>0.017</b> | 0.41 (0.29,0.58) | <b>&lt;0.001</b> |
| Keeping a diary                   | 1.14 (0.94,1.38) | 0.176        | 0.53 (0.34,0.82) | <b>0.005</b>     |
| Writing articles                  | 1.02 (0.87,1.20) | 0.816        | 0.78 (0.57,1.07) | 0.120            |
| TV watching or listening to radio | 1.24 (0.88,1.74) | 0.213        | 0.79 (0.52,1.21) | 0.279            |
| Playing cards or mahjong          | 1.05 (0.92,1.20) | 0.479        | 0.82 (0.65,1.04) | 0.099            |

controlling for age, education years, smoking, drinking, family history of dementia, and history of NCDs.

**Table S8. The ORs (and 95% CIs) of MCI and dementia associated with per 10  $\mu\text{g}/\text{m}^3$  increase in  $\text{PM}_{2.5}$  or  $\text{PM}_{10}$ .**

| Models               | $\text{PM}_{2.5}$ (ORs and 95% CIs) |                   | $\text{PM}_{10}$ (ORs and 95% CIs) |                   |
|----------------------|-------------------------------------|-------------------|------------------------------------|-------------------|
|                      | MCI                                 | Dementia          | MCI                                | Dementia          |
| Model 1 <sup>a</sup> | 1.33 (1.23, 1.44)                   | 1.10 (0.99, 1.22) | 0.99 (0.97, 1.02)                  | 1.03 (0.98, 1.09) |
| Model 2 <sup>b</sup> | 1.42 (1.31, 1.54)                   | 1.20 (1.07, 1.34) | 1.00 (0.97, 1.04)                  | 1.08 (1.02, 1.15) |
| Model 3 <sup>c</sup> | 1.52 (1.39, 1.67)                   | 1.27 (1.11, 1.46) | 1.04 (1.00, 1.08)                  | 1.13 (1.05, 1.21) |
| Model 4 <sup>d</sup> | 1.55 (1.42, 1.70)                   | 1.28 (1.11, 1.47) | 1.04 (1.00, 1.09)                  | 1.11 (1.03, 1.19) |

<sup>a</sup>: Model 1, a crude model including only one air pollutant; <sup>b</sup>: Model 2, an adjusted model controlling age, education years, smoking and drinking; <sup>c</sup>: Model 3, an adjusted model controlling age, education years, smoking, drinking, family history of dementia, and history of NCDs. <sup>d</sup>: an adjusted model controlling age, education years, smoking, drinking, family history of dementia, history of NCDs, and personal hobbies. In all models, city was modeled as random effect.

**Table S9. Analysis of modification effects of several factors on the association between PM and MCI or dementia**

| Factors              | PM <sub>2.5</sub> <sup>ab</sup> |        |              |                   |        |              | PM <sub>10</sub> (ORs and 95% CIs) <sup>ab</sup> |        |              |                   |        |              |  |
|----------------------|---------------------------------|--------|--------------|-------------------|--------|--------------|--------------------------------------------------|--------|--------------|-------------------|--------|--------------|--|
|                      | MCI                             |        |              | Dementia          |        |              | MCI                                              |        |              | Dementia          |        |              |  |
|                      | OR (95%CI)                      | z      | p            | OR (95%CI)        | z      | p            | OR (95%CI)                                       | z      | p            | OR (95%CI)        | z      | p            |  |
| Age (years)          |                                 |        |              |                   |        |              |                                                  |        |              |                   |        |              |  |
| < 80                 | 1.57 (1.29, 1.90)               | 0.356  | 0.722        | 1.02 (0.69, 1.49) | -1.109 | 0.267        | 0.97 (0.92, 1.02)                                | -2.674 | <b>0.008</b> | 1.02 (0.84, 1.24) | -0.919 | 0.358        |  |
| ≥80                  | 1.51 (1.36, 1.67)               |        |              | 1.28 (1.11, 1.47) |        |              | 1.07 (1.01, 1.12)                                |        |              | 1.13 (1.05, 1.22) |        |              |  |
| Years of education   |                                 |        |              |                   |        |              |                                                  |        |              |                   |        |              |  |
| ≤9                   | 1.62 (1.45, 1.81)               | -2.105 | <b>0.035</b> | 1.34 (1.14, 1.57) | -1.537 | 0.124        | 1.03 (0.98, 1.08)                                | 0.137  | 0.891        | 1.12 (1.04, 1.22) | -0.083 | 0.934        |  |
| > 9                  | 1.33 (1.15, 1.54)               |        |              | 1.06 (0.83, 1.37) |        |              | 1.04 (0.96, 1.12)                                |        |              | 1.12 (0.97, 1.28) |        |              |  |
| Physical activities  |                                 |        |              |                   |        |              |                                                  |        |              |                   |        |              |  |
| Yes                  | 1.54 (1.40, 1.69)               | 0.509  | 0.611        | 1.37 (1.17, 1.61) | 2.636  | <b>0.008</b> | 1.04 (0.99, 1.08)                                | -0.070 | 0.945        | 1.15 (1.06, 1.25) | 1.089  | 0.276        |  |
| No                   | 1.42 (1.08, 1.87)               |        |              | 0.91 (0.70, 1.18) |        |              | 1.04 (0.93, 1.17)                                |        |              | 1.04 (0.90, 1.21) |        |              |  |
| Social activities    |                                 |        |              |                   |        |              |                                                  |        |              |                   |        |              |  |
| Yes                  | 1.40 (1.22, 1.60)               | -1.634 | 0.102        | 1.09 (0.85, 1.40) | -1.405 | 0.160        | 1.08 (1.01, 1.16)                                | 1.837  | 0.066        | 1.13 (0.99, 1.29) | 0.111  | 0.911        |  |
| No                   | 1.63 (1.45, 1.84)               |        |              | 1.35 (1.15, 1.58) |        |              | 1.01 (0.97, 1.04)                                |        |              | 1.12 (1.03, 1.22) |        |              |  |
| Smoking              |                                 |        |              |                   |        |              |                                                  |        |              |                   |        |              |  |
| Current <sup>c</sup> | 1.47 (1.30, 1.66)               | -0.041 | 0.968        | 1.07 (0.9, 1.28)  | 1.577  | 0.115        | 1.02 (0.97, 1.07)                                | -1.174 | 0.241        | 1.06 (0.97, 1.16) | 1.004  | 0.316        |  |
| Former <sup>c</sup>  | 1.61 (1.39, 1.86)               | 0.922  | 0.356        | 1.50 (1.20, 1.87) | 2.290  | 0.022        | 1.08 (1.01, 1.16)                                | 1.375  | 0.169        | 1.19 (1.07, 1.34) | 1.592  | 0.111        |  |
| Never                | 1.46 (1.07, 1.98)               | -      | -            | 1.73 (0.98, 3.04) | -      | -            | 0.96 (0.87, 1.05)                                | -      | -            | 1.23 (0.93, 1.62) | -      | -            |  |
| Drinking             |                                 |        |              |                   |        |              |                                                  |        |              |                   |        |              |  |
| Current <sup>d</sup> | 1.62 (1.19, 2.19)               | 0.144  | 0.885        | 1.66 (0.97, 2.86) | 1.413  | 0.158        | 1.09 (0.95, 1.26)                                | 1.118  | 0.264        | 1.31 (1.00, 1.71) | 1.796  | 0.072        |  |
| Former <sup>d</sup>  | 1.50 (1.26, 1.79)               | -0.461 | 0.645        | 1.61 (1.18, 2.21) | 2.051  | <b>0.040</b> | 1.08 (0.99, 1.18)                                | 1.531  | 0.126        | 1.53 (1.28, 1.84) | 4.019  | <b>0.000</b> |  |
| Seldom <sup>d</sup>  | 1.41 (1.14, 1.74)               | -0.909 | 0.364        | 1.19 (0.88, 1.60) | 0.429  | 0.668        | 1.08 (0.97, 1.20)                                | 1.210  | 0.226        | 1.05 (0.90, 1.24) | 0.485  | 0.628        |  |
| Never                | 1.58 (1.39, 1.80)               | -      | -            | 1.10 (0.91, 1.32) | -      | -            | 1.00 (0.97, 1.04)                                | -      | -            | 1.01 (0.92, 1.10) | -      | -            |  |
| Diabetes mellitus    |                                 |        |              |                   |        |              |                                                  |        |              |                   |        |              |  |
| Yes                  | 1.58 (1.34, 1.88)               | 0.447  | 0.655        | 1.27 (0.99, 1.62) | 0.071  | 0.944        | 1.10 (1.02, 1.20)                                | 1.742  | 0.081        | 1.07 (0.94, 1.21) | -0.985 | 0.325        |  |

|                     |     |                   |        |              |                   |        |       |                   |        |              |                   |        |              |
|---------------------|-----|-------------------|--------|--------------|-------------------|--------|-------|-------------------|--------|--------------|-------------------|--------|--------------|
| Hypertension        | No  | 1.51 (1.36, 1.68) |        |              | 1.26 (1.07, 1.48) |        |       | 1.01 (0.97, 1.06) |        |              | 1.15 (1.06, 1.25) |        |              |
|                     | Yes | 1.48 (1.33, 1.65) | -0.738 | 0.460        | 1.26 (1.08, 1.48) | 0.018  | 0.986 | 1.08 (1.02, 1.14) | 2.265  | <b>0.024</b> | 1.16 (1.07, 1.26) | 1.368  | 0.171        |
| Hyperlipidemia      | No  | 1.60 (1.35, 1.89) |        |              | 1.26 (0.97, 1.63) |        |       | 0.99 (0.95, 1.04) |        |              | 1.05 (0.92, 1.19) |        |              |
|                     | Yes | 1.50 (1.31, 1.71) | -0.211 | 0.833        | 1.42 (1.14, 1.76) | 1.491  | 0.136 | 1.19 (1.11, 1.28) | 5.217  | <b>0.000</b> | 1.24 (1.10, 1.40) | 2.271  | <b>0.023</b> |
| Cerebral infarction | No  | 1.53 (1.35, 1.72) |        |              | 1.15 (0.97, 1.37) |        |       | 0.97 (0.94, 1.00) |        |              | 1.05 (0.96, 1.14) |        |              |
|                     | Yes | 1.16 (1.01, 1.33) | -3.805 | <b>0.000</b> | 1.11 (0.90, 1.38) | -1.346 | 0.178 | 1.02 (0.96, 1.08) | -0.883 | 0.377        | 1.02 (0.92, 1.14) | -1.878 | 0.060        |
|                     | No  | 1.61 (1.46, 1.79) |        |              | 1.34 (1.13, 1.58) |        |       | 1.06 (1.01, 1.11) |        |              | 1.16 (1.07, 1.27) |        |              |

<sup>a</sup> fully adjusted models controlling age, education years, smoking, drinking, family history of dementia, and history of NCDs. In all models, city was set as random effect factor. ORs and 95% CIs were associated with per 10  $\mu\text{g}/\text{m}^3$  increase in each pollutant. <sup>b</sup> the significance of difference in effect estimates between different subgroups was examined using a two-sample test. For smoking and drinking, the never smoke and never drink groups were set as the reference groups. \*  $p < 0.05$  in the two-sample test. \*\*  $p < 0.01$  in the two-sample test.

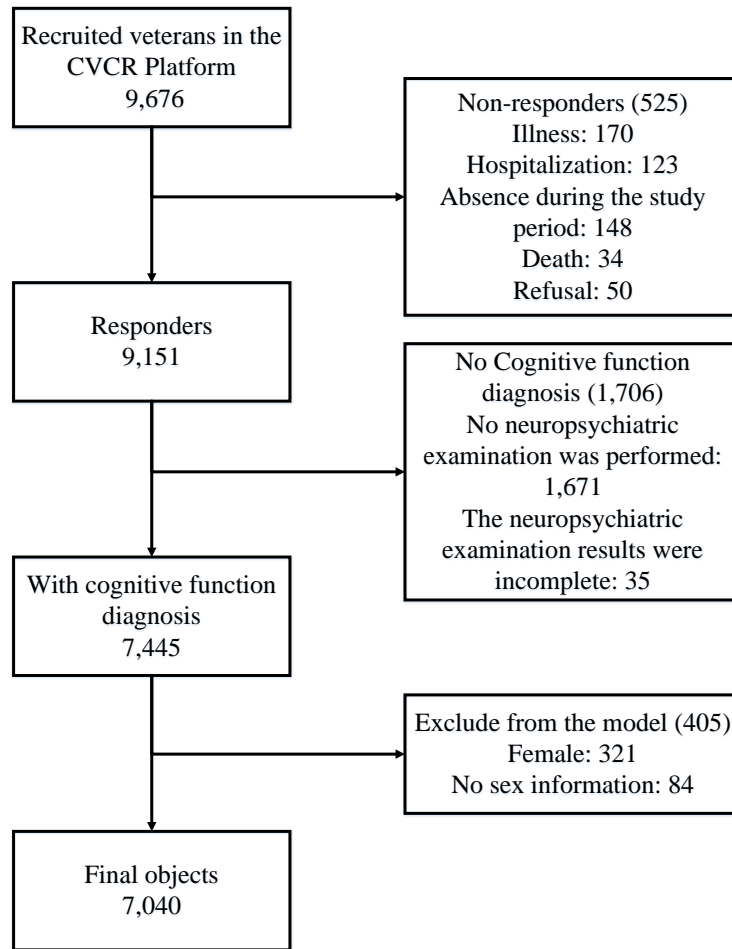

**Figure S1. Flow chart of research object selection**



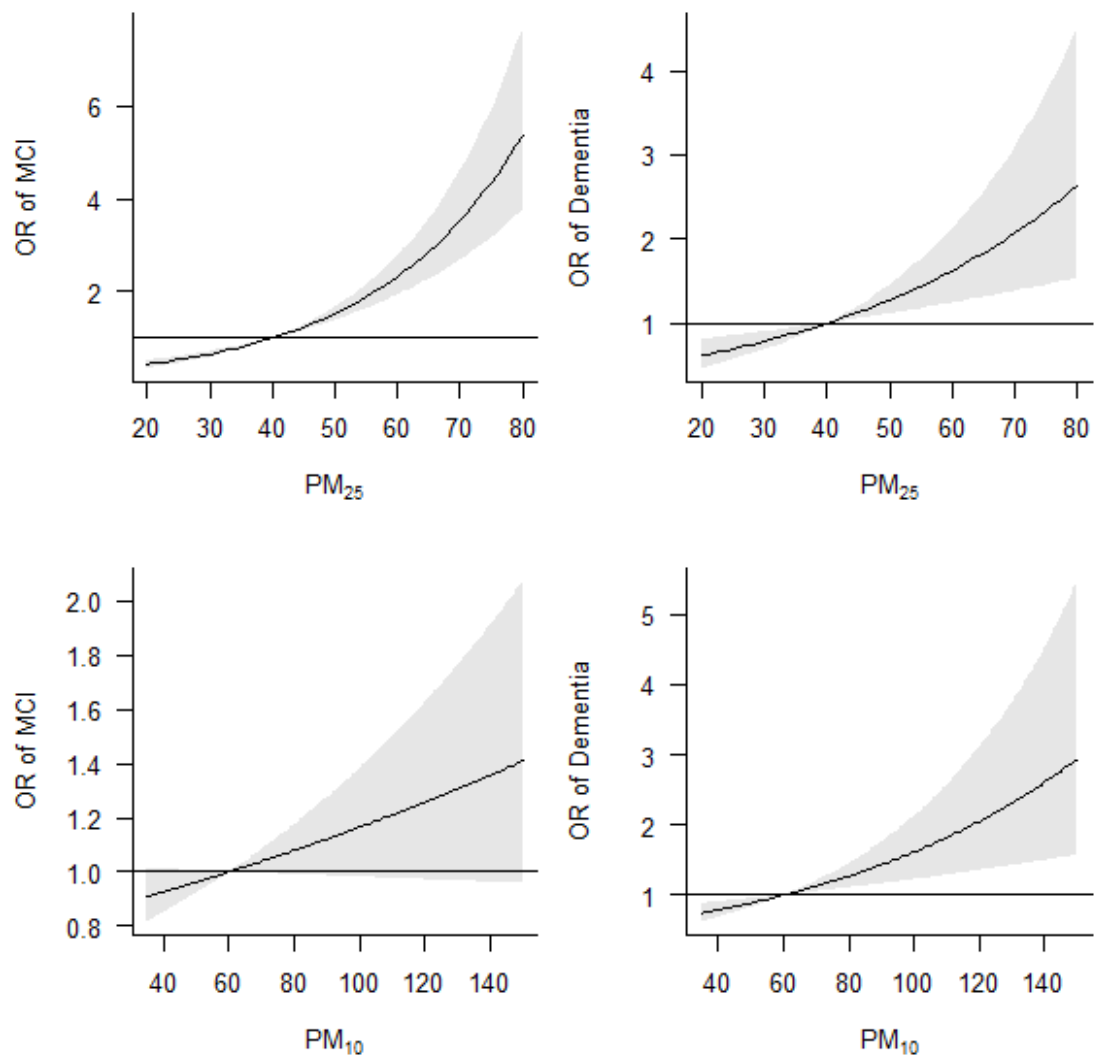

**Figure S2. The non-linear associations between PM and MCI/dementia using natural cubic splines with three degrees of freedom on PM**

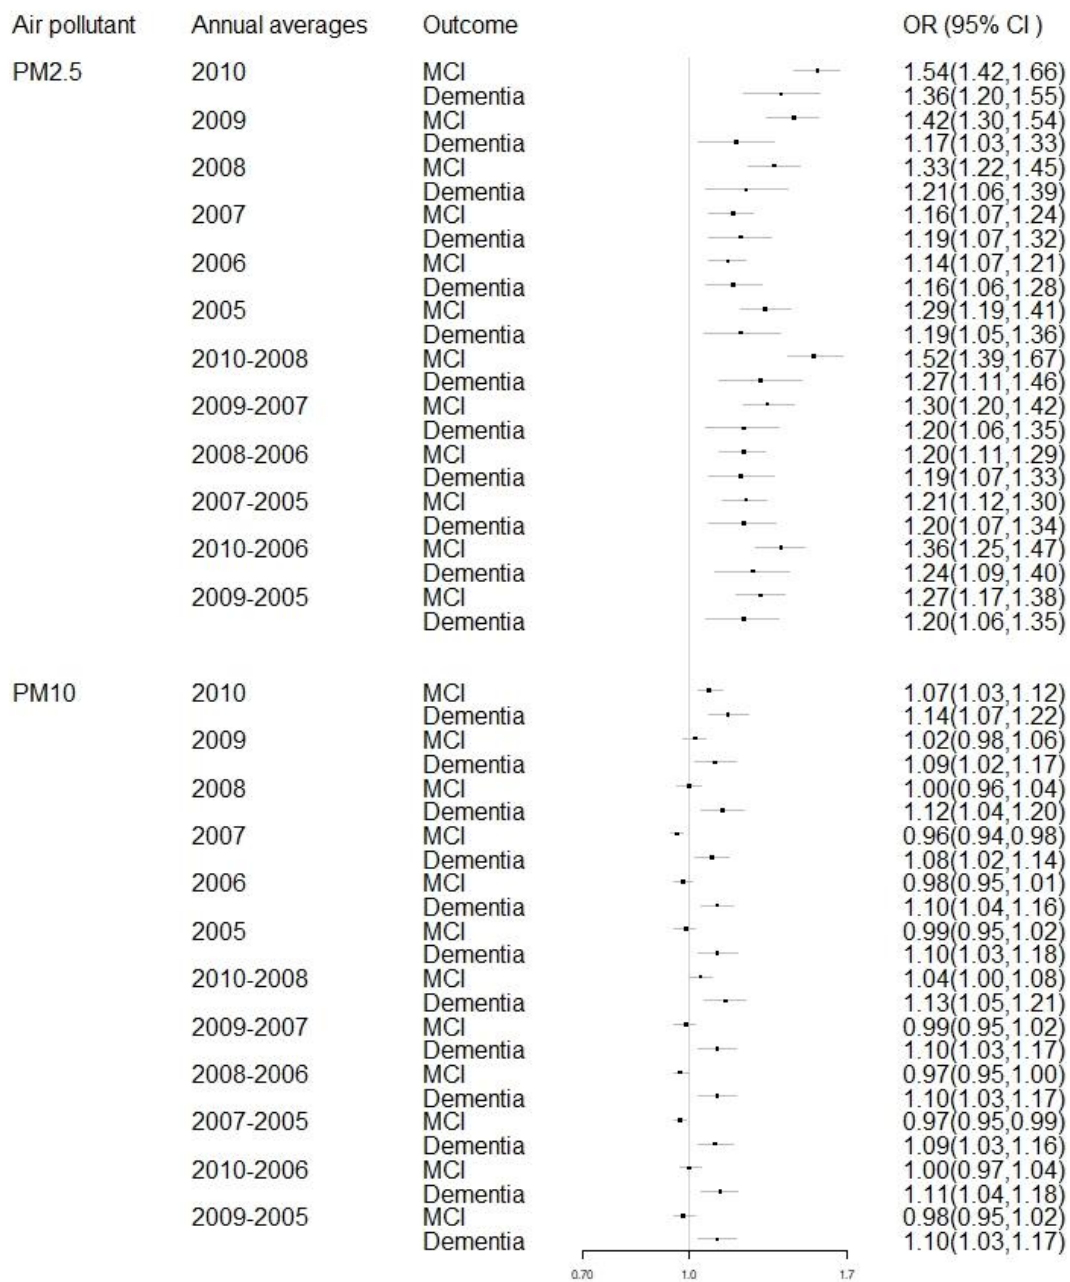

Figure S3. The sub-analyses for the evaluation of time scales for PM exposures
