# Supplementary material for: Associations of particulate matter with dementia and mild cognitive impairment in China: A multicenter cross-sectional study
Source: PubMed Central journal article supplement — Innovation (Camb). 2021 Jul 21;2(3):100147. doi: 10.1016/j.xinn.2021.100147 (PMC8454741; doi:10.1016/j.xinn.2021.100147), 2021-07-21
Supplement: mmc2.pdf [file mmc2.pdf]

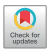

# Associations of particulate matter with dementia and mild cognitive impairment in China: A multicenter cross-sectional study

Jiping Tan,<sup>1,6</sup> Nan Li,<sup>2,6</sup> Xiaoxiao Wang,<sup>2,6</sup> Gongbo Chen,<sup>3</sup> Lailai Yan,<sup>4</sup> Luning Wang,<sup>1,\*</sup> Yiming Zhao,<sup>2</sup> Shanshan Li,<sup>5</sup> and Yuming Guo<sup>5,\*</sup>

\*Correspondence: [yuming.guo@monash.edu](mailto:yuming.guo@monash.edu) (Y.G.); [lnw\\_301@163.com](mailto:lnw_301@163.com) (L.W.)

Received: March 26, 2021; Accepted: July 19, 2021; Published Online: July 21, 2021; <https://doi.org/10.1016/j.xinn.2021.100147>

© 2021 This is an open access article under the CC BY-NC-ND license (<http://creativecommons.org/licenses/by-nc-nd/4.0/>).

## Graphical abstract

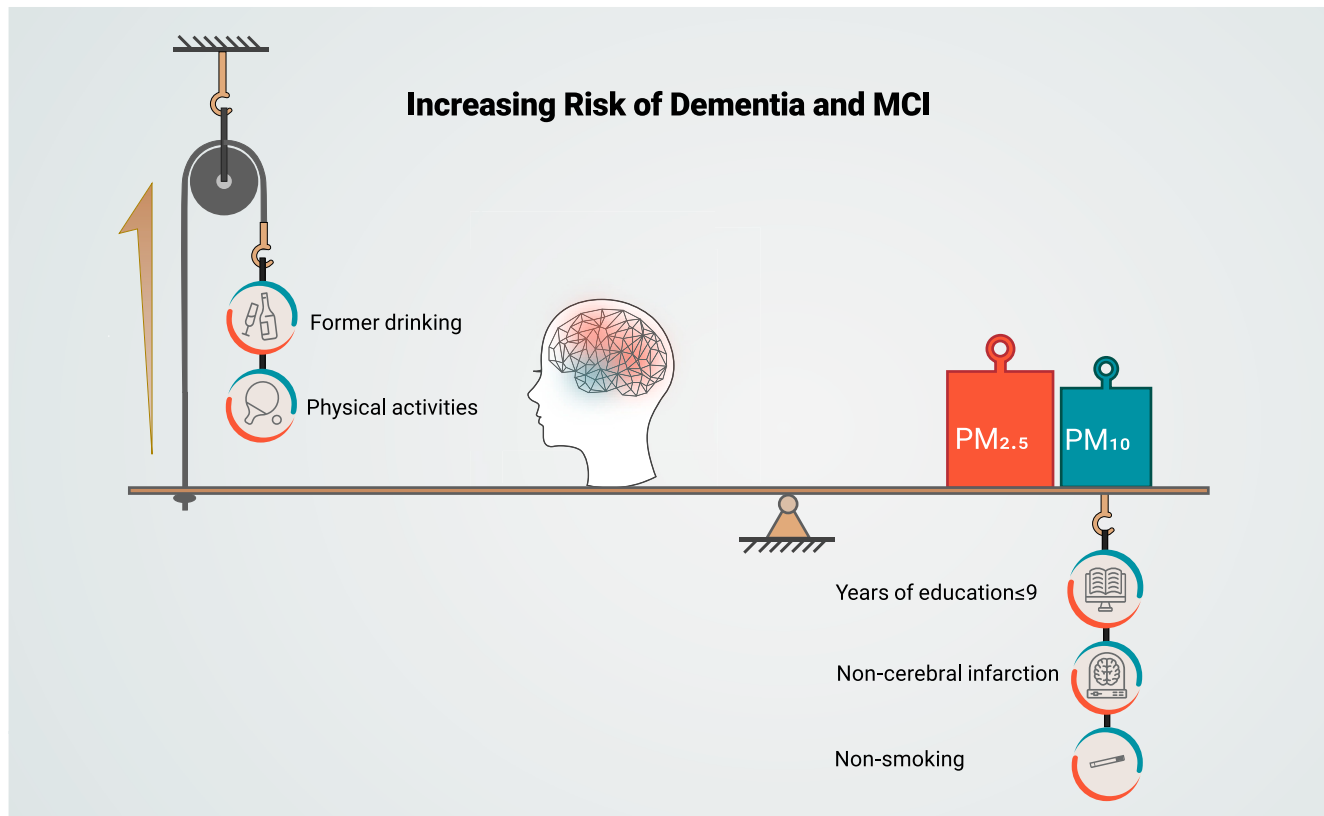

## Public summary

- Dementia and MCI are emerging as major public health problems, and PM<sub>2.5</sub> is hypothesized to be associated with dementia and MCI
- We examined the cognitive function of elderly veterans from 277 communities (a well-characterized population with low residential mobility, similar living habits, standardized assessment of both exposure and outcome), in 18 Chinese cities from December 2009 to December 2011
- Long-term exposure to PM, especially PM<sub>2.5</sub> showed associations with dementia and MCI
- The effect was more pronounced for people with no more than nine years of education
- Besides, people with fewer other risk factors (lack of physical activities, smoking, drinking, cerebral infarction) are more susceptible to PM<sub>2.5</sub>
- Improvement of ambient air quality, especially PM<sub>2.5</sub>, might be helpful to decrease the risk of dementia and MCI

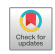

# Associations of particulate matter with dementia and mild cognitive impairment in China: A multicenter cross-sectional study

Jiping Tan,<sup>1,6</sup> Nan Li,<sup>2,6</sup> Xiaoxiao Wang,<sup>2,6</sup> Gongbo Chen,<sup>3</sup> Lailai Yan,<sup>4</sup> Luning Wang,<sup>1,\*</sup> Yiming Zhao,<sup>2</sup> Shanshan Li,<sup>5</sup> and Yuming Guo<sup>5,\*</sup>

<sup>1</sup>Geriatric Neurology Department of The Second Medical Center & National Clinical Research Center for Geriatric Diseases, Chinese PLA General Hospital, Beijing 100039, China

<sup>2</sup>Research Center of Clinical Epidemiology, Peking University Third Hospital, Beijing 100191, China

<sup>3</sup>Guangdong Provincial Engineering Technology Research Center of Environmental and Health risk Assessment; Department of Occupational and Environmental Health, School of Public Health, Sun Yat-sen University, Guangzhou 510080, China

<sup>4</sup>Department of Laboratorial Science and Technology, School of Public Health, Peking University, Beijing 100191, China

<sup>5</sup>Department of Epidemiology and Preventive Medicine, School of Public Health and Preventive Medicine, Monash University, Melbourne, Australia

<sup>6</sup>These authors contributed equally

\*Correspondence: [yuming.guo@monash.edu](mailto:yuming.guo@monash.edu) (Y.G.); [lnw\\_301@163.com](mailto:lnw_301@163.com) (L.W.)

Received: March 26, 2021; Accepted: July 19, 2021; Published Online: July 21, 2021; <https://doi.org/10.1016/j.xinn.2021.100147>

© 2021 This is an open access article under the CC BY-NC-ND license (<http://creativecommons.org/licenses/by-nc-nd/4.0/>).

Citation: Tan J., Li N., Wang X., et al., (2021). Associations of particulate matter with dementia and mild cognitive impairment in China: A multicenter cross-sectional study. *The Innovation* 2(3), 100147.

Ambient air pollution has been shown to be associated with the pathogenesis of dementia and mild cognitive impairment (MCI). However, few studies have examined these associations in well-characterized populations with low residential mobility, similar living habits, and a standardized assessment of both air pollution exposure and clinical outcome. This study examined the associations of long-term exposure to particulate matter (PM) air pollution with dementia and MCI, using data from the Chinese Veteran Clinical Research Platform. The cognitive function of elderly veterans from 277 communities in 18 Chinese cities was examined. Participants' daily exposures to aerodynamic diameters  $\leq 2.5 \mu\text{m}$  ( $\text{PM}_{2.5}$ ) and  $\leq 10 \mu\text{m}$  ( $\text{PM}_{10}$ ) during the 3 years prior to the survey were estimated using a satellite-based prediction. The adjusted odds ratios (ORs) and 95% confidence intervals of MCI associated with each  $10 \mu\text{g}/\text{m}^3$  increase in  $\text{PM}_{2.5}$  and  $\text{PM}_{10}$  were 1.52 (1.39, 1.67) and 1.04 (1.00, 1.08), and those of dementia associated with  $\text{PM}_{2.5}$  and  $\text{PM}_{10}$  were 1.27 (1.11, 1.46) and 1.13 (1.05, 1.21), respectively. This demonstrates that long-term exposure to  $\text{PM}_{2.5}$  and  $\text{PM}_{10}$  can increase the prevalence of dementia/MCI among veterans in China. Higher ORs were observed for those with  $\leq 9$  years of educational attainment, those who actively attended physical activities, those who never smoked, former drinkers, and those who did not suffer from cerebral infarction. Improvement of ambient air quality, especially decreasing levels of  $\text{PM}_{2.5}$ , may help to decrease the risk of dementia/MCI. Given the statistically significant association between PM and cognitive impairment demonstrated here, future studies should focus on examining the causal effect of PM pollution on dementia and MCI.

**Keywords:** particulate matter; dementia; MCI; air pollution

## INTRODUCTION

Dementia, a neuropsychiatric disease characterized by cognitive impairment, imposes a heavy burden on patients, their families, and society as a whole.<sup>1</sup> Dementia has become a major public health concern in China due to the rapid growth of the elderly population<sup>2</sup>; it was estimated in 2016 that among 23 million Chinese aged 60 years and over, almost 9.5 million, were suffering from dementia, and this figure was projected to double by 2030.<sup>3</sup> Alzheimer disease, a progressive and irreversible neurodegenerative disorder, is the most common subtype of dementia, accounting for 60%–70% of dementia cases.<sup>4</sup> The causes of dementia remain unclear, although genetic and environmental factors may play important roles in the etiology. Dementia is currently incurable,<sup>5</sup> and therefore mild cognitive impairment (MCI), which

is diagnosable prior to more severe forms of cognitive impairment such as dementia, has been proposed as an early intervention target.

Recent research has indicated that ambient air pollution, such as airborne particulate matter (PM) with a diameter of  $2.5 \mu\text{m}$  or less ( $\text{PM}_{2.5}$ ), is potentially associated with the pathogenesis of dementia.<sup>6</sup> Some studies have also demonstrated that chronic exposure to PM air pollution can induce inflammation in the brain and accelerate  $\beta$ -amyloid deposition and neurodegeneration, which are associated with brain damage, cognitive decline, and the development of dementia.<sup>7–9</sup> In addition, some recent studies from Western countries (e.g., the United States and Europe) have suggested an association between traffic pollution and decreased cognitive function in adults.<sup>10,11</sup>

Although a great deal of evidence has suggested that PM is associated with a wide range of negative health outcomes, such as cardiovascular and respiratory diseases,<sup>12–15</sup> limited attention has been paid to neurological and mental effects of PM pollution. In particular, there are few studies investigating the impact of air pollution on dementia and MCI, and the studies that have been done share several important limitations.<sup>16–18</sup> First, participants may have been misclassified with respect to the type or level of PM exposure as a result of living in different areas over time, and high-level exposure to  $\text{PM}_{2.5}$  (more than  $33.0 \mu\text{g}/\text{m}^3$ ) was not considered. Second, cognitive conditions were identified with screening tests or ICD-9 (Ninth Revision of International Classification of Diseases) codes, which may lead to outcome misclassification. Third, a number of potentially confounding factors were not accounted for, including physical inactivity, unhealthy diet, social isolation, cognitive inactivity, sleep deprivation, and medical services such as access and quality. Finally, few old-old (70–79 years old) and oldest-old ( $\geq 80$  years old) participants were included. Therefore, the present study aimed to examine the associations of long-term exposure to PM air pollution with dementia and MCI, using data from the Chinese Veteran Clinical Research (CVCR) platform to address the limitations of prior studies.

## RESULTS

### Sociodemographic characteristics and prevalence of dementia and MCI

A total of 277 veteran communities (Figure 1), with 9,676 Chinese veterans aged 60 years and older, were recruited via the CVCR platform. Among these veterans, 7,445 had complete information regarding the neuropsychological tests and clinical diagnoses. The sex information data of 84 participants were missing. Data from 7,040 male veterans were included in the analysis after female participant data ( $n = 321$ ) were excluded (Figure S1). As a result, 921 cases of dementia and 2,180 cases of MCI were identified with

**Table 1.** Basic sociodemographic characteristics of participants and their exposure to PM<sub>2.5</sub> and PM<sub>10</sub> (μg/m<sup>3</sup>) during the 3 years prior to the survey

| Factors                    | N     | %    | PM <sub>2.5</sub> median (Q1, Q3) | PM <sub>10</sub> median (Q1, Q3) |
|----------------------------|-------|------|-----------------------------------|----------------------------------|
| <b>Age (years)</b>         |       |      |                                   |                                  |
| <80                        | 2,024 | 28.8 | 54.70 (48.02, 71.27)              | 100.16 (84.59, 128.34)           |
| ≥80                        | 4,946 | 70.3 | 55.23 (48.15, 71.46)              | 100.16 (83.66, 128.34)           |
| Missing values             | 70    | 1.0  | 56.25 (46.29, 73.49)              | 100.23 (75.84, 131.79)           |
| <b>Years of education</b>  |       |      |                                   |                                  |
| ≤9                         | 4,564 | 64.8 | 55.32 (48.31, 71.70)              | 101.12 (84.21, 128.78)           |
| >9                         | 2,476 | 35.2 | 54.70 (47.24, 59.88)              | 99.95 (83.56, 111.47)            |
| <b>Physical activities</b> |       |      |                                   |                                  |
| Yes                        | 6,000 | 85.2 | 54.89 (48.14, 71.46)              | 100.16 (83.76, 128.34)           |
| No                         | 1,009 | 14.3 | 55.30 (48.73, 71.46)              | 100.31 (83.66, 128.34)           |
| Missing values             | 31    | 0.4  | 53.77 (45.07, 55.95)              | 91.41 (69.68, 100.98)            |
| <b>Social activities</b>   |       |      |                                   |                                  |
| Yes                        | 2,710 | 38.5 | 55.24 (48.23, 71.62)              | 99.95 (82.82, 128.78)            |
| No                         | 4,170 | 59.2 | 54.82 (48.03, 71.46)              | 100.34 (84.19, 128.34)           |
| Missing values             | 160   | 2.3  | 55.95 (54.70, 69.88)              | 100.98 (99.95, 125.37)           |
| <b>Smoking</b>             |       |      |                                   |                                  |
| Current                    | 561   | 8.0  | 54.33 (47.25, 70.89)              | 100.31 (84.07, 127.69)           |
| Former                     | 2,328 | 33.1 | 54.89 (48.03, 71.27)              | 100.15 (83.66, 127.87)           |
| Never                      | 3,920 | 55.7 | 55.21 (48.15, 71.49)              | 100.16 (83.71, 128.34)           |
| Missing values             | 231   | 3.3  | 56.08 (54.11, 72.30)              | 100.98 (94.63, 131.61)           |
| <b>Drinking</b>            |       |      |                                   |                                  |
| Current                    | 513   | 7.3  | 55.21 (48.14, 71.27)              | 98.82 (82.55, 128.34)            |
| Former                     | 1,115 | 15.8 | 55.24 (48.15, 71.27)              | 99.95 (82.67, 127.23)            |
| Seldom                     | 1,689 | 24.0 | 55.21 (48.15, 71.27)              | 100.09 (83.69, 128.34)           |
| Never                      | 3,510 | 49.9 | 54.89 (48.03, 71.46)              | 100.35 (84.17, 128.34)           |
| Missing values             | 213   | 3.0  | 55.95 (53.07, 72.53)              | 100.98 (95.00, 133.39)           |
| <b>Diabetes mellitus</b>   |       |      |                                   |                                  |
| Yes                        | 1,892 | 26.9 | 55.23 (48.31, 71.46)              | 100.09 (84.17, 128.34)           |
| No                         | 5,089 | 72.3 | 54.89 (48.03, 71.46)              | 100.31 (83.66, 128.34)           |
| Missing values             | 59    | 0.8  | 55.95 (55.27, 58.72)              | 100.98 (100.32, 106.5)           |
| <b>Hypertension</b>        |       |      |                                   |                                  |
| Yes                        | 4,713 | 66.9 | 55.21 (48.15, 71.46)              | 100.15 (83.66, 128.34)           |
| No                         | 2,282 | 32.4 | 55.21 (48.03, 71.55)              | 101.12 (84.19, 129.69)           |
| Missing values             | 45    | 0.6  | 55.95 (53.77, 59.14)              | 100.98 (96.90, 107.10)           |
| <b>Hyperlipidemia</b>      |       |      |                                   |                                  |
| Yes                        | 2,631 | 37.4 | 55.21 (48.73, 71.27)              | 99.02 (83.56, 127.69)            |
| No                         | 4,311 | 61.2 | 55.21 (48.02, 71.60)              | 103.43 (84.21, 128.78)           |
| Missing values             | 98    | 1.4  | 55.95 (53.21, 60.27)              | 100.98 (86.30, 107.70)           |

**Table 1. Continued**

| Factors                    | N     | %    | PM <sub>2.5</sub> median (Q1, Q3) | PM <sub>10</sub> median (Q1, Q3) |
|----------------------------|-------|------|-----------------------------------|----------------------------------|
| <b>Cerebral infarction</b> |       |      |                                   |                                  |
| Yes                        | 1,468 | 21.9 | 54.89 (48.34, 70.90)              | 99.96 (83.67, 125.37)            |
| No                         | 5,503 | 78.2 | 55.21 (48.07, 71.60)              | 100.31 (83.68, 128.78)           |
| Missing values             | 69    | 1.0  | 55.95 (55.27, 59.53)              | 100.98 (100.32, 106.50)          |
| Total                      | 7,040 | 100  | –                                 | –                                |

prevalence rates of 13.1% and 31.0%, respectively. The prevalence of dementia in our population was comparable with the age-standardized prevalence of dementia (15.2%) (Table S2). The basic sociodemographic characteristics of the veterans are summarized in Table 1.

### Exposure to PM pollution during the study period

Participants' historical exposure to air pollution is summarized in Table S3. Mean levels of participants' exposures to PM<sub>2.5</sub> and PM<sub>10</sub> (minimum, maximum) were 56.92 (30.46, 84.23) μg/m<sup>3</sup> and 102.71 (53.38, 143.14) μg/m<sup>3</sup>. The mean ratio of PM<sub>2.5</sub>/PM<sub>10</sub> during the study period was 0.56 (0.40, 0.60).

### PM pollution and the prevalence of dementia and MCI

Long-term exposure to PM<sub>2.5</sub> was significantly associated with a higher proportion of MCI and dementia in both the crude and adjusted models, while significant associations of PM<sub>10</sub> with MCI and dementia were only found in the fully adjusted models (Figure 2). In the crude models, the ORs (and 95% confidence intervals [CIs]) of MCI and dementia associated with each 10-μg/m<sup>3</sup> increase in PM<sub>2.5</sub> were 1.33 (95% CI: 1.23, 1.44) and 1.10 (95% CI: 0.99, 1.22), respectively. After full adjustment, the ORs (and 95% CIs) of MCI associated with each 10-μg/m<sup>3</sup> increase in PM<sub>2.5</sub> and PM<sub>10</sub> were 1.52 (1.39, 1.67) and 1.04 (1.00, 1.08). Moreover, the ORs (and 95% CIs) of dementia in relation to per-10 μg/m<sup>3</sup> increase in PM<sub>2.5</sub> and PM<sub>10</sub> were 1.27 (1.11, 1.46) and 1.13 (1.05, 1.21), respectively.

### Effect modification by potential covariates

Some basic sociodemographic factors remarkably modified the relationships between PM<sub>2.5</sub> exposure and the prevalence of dementia or MCI (Table 2). The association between PM<sub>2.5</sub> exposure and MCI was strengthened in participants with ≤9 years of educational attainment (OR = 1.62 [95% CI: 1.45, 1.81]) compared with those with >9 years (OR = 1.33 [95% CI: 1.15, 1.54], p = 0.035). The association between PM<sub>10</sub> exposure and MCI was strengthened in participants aged ≥80 years (OR = 1.07 [95% CI: 1.01, 1.12]) compared with those <80 years (OR = 0.97 [95% CI: 0.92, 1.02], p = 0.008). The association between PM<sub>2.5</sub> exposure and dementia was strengthened in non-smokers compared with former smokers. In addition, compared with never drinking, former drinkers showed significantly higher ORs of dementia (Table 2). Suffering from hypertension strengthened the association between PM<sub>10</sub> and MCI, while suffering from hyperlipidemia strengthened the association between PM<sub>10</sub> and the prevalence of both MCI and dementia (Table 2). The association between PM<sub>2.5</sub> exposure and MCI was strengthened in participants without cerebral infarction. The association between PM<sub>2.5</sub> exposure and dementia was strengthened in participants who were physically active (Table 2). The ORs of MCI or dementia for participants with social activities were lower than those without social activities, but the difference was not statistically significant. No significant effect modifications were found for a history of diabetes mellitus.

## DISCUSSION

This multicenter cross-sectional study demonstrated that long-term exposure to PM air pollution was significantly associated with dementia and MCI among Chinese veterans. The associations from the fully adjusted model are

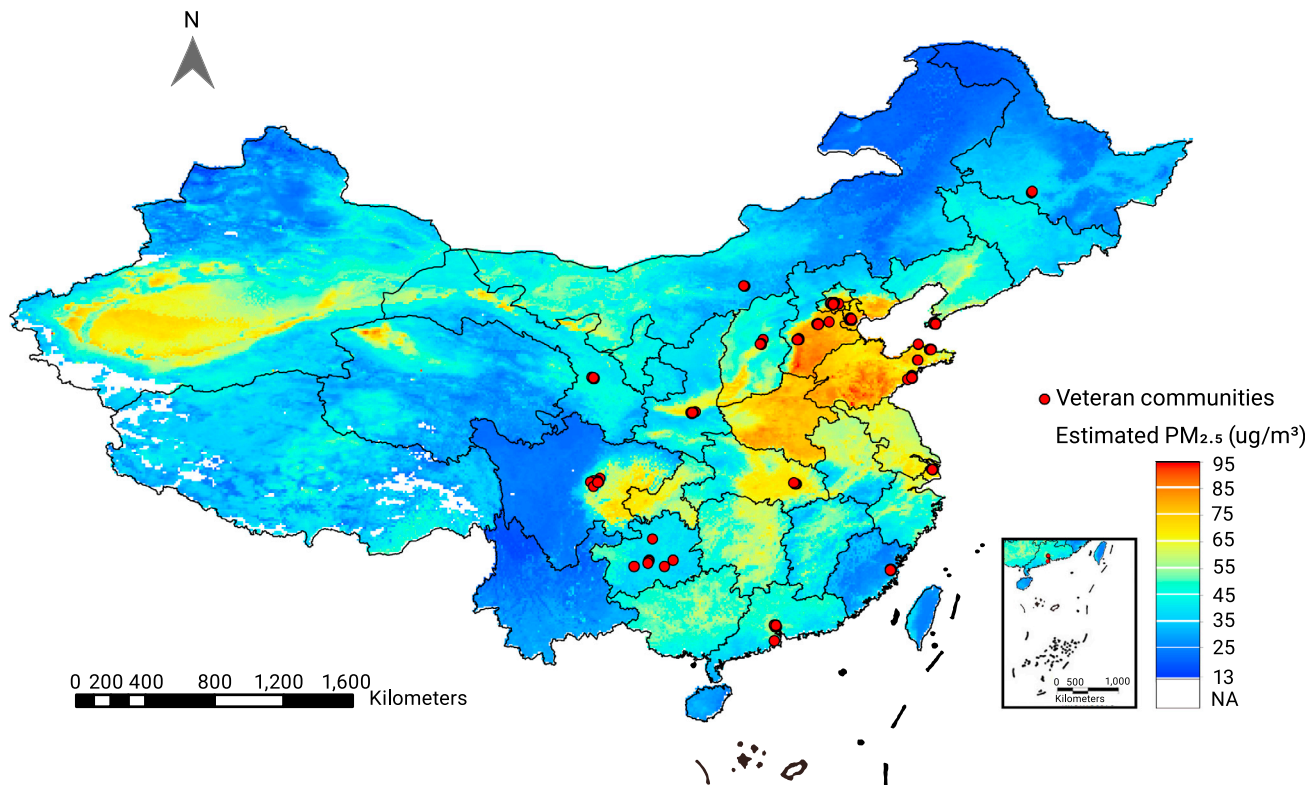

Figure 1. Locations of veteran communities included in this study

more reliable since this model controlled for more confounding factors. Higher ORs were observed for those with  $\leq 9$  years of educational attainment, those who were physically active, former drinkers, those who had never smoked, and those who had not suffered from cerebral infarction. In addition, long-term exposure to  $PM_{2.5}$  was found to have a greater impact on MCI and dementia than  $PM_{10}$ . Overall, our results suggest that exposure to ambient particulate matter, especially to  $PM_{2.5}$ , has significant adverse impacts on brain health and cognitive function.

Current experimental evidence and postmortem studies on the harmful effects of PM pollution in relation to dementia pathogenesis and cognitive impairment are insufficient and inconsistent. Some epidemiological studies have demonstrated significant associations of long-term exposure to

$PM_{2.5}$  or  $PM_{10}$  and dementia/MCI in the elderly and middle-aged population,<sup>19–22</sup> with some specifically reporting that PM from wood-burning and traffic-related sources were associated with dementia and MCI.<sup>23,24</sup> However, some studies have reported that  $PM_{2.5}$  exposure had no impact on the incidence of cognitive impairment and that long-term exposure to  $PM_{10}$  was not related to reduced cognitive functions among adults.<sup>25,26</sup> One explanation for the inconsistent findings is that there are a number of risk factors that lead to dementia/MCI (e.g., PM air pollution, stroke, APOE gene variants) and some of those risk factors might be more or less important depending on the circumstances. In a diverse population, the association between PM and dementia/MCI may not be significant if other risk factors are more important.

Identification of potentially susceptible subgroups is crucial to reducing the adverse impacts of PM air pollution. We examined the effect modifications of several potential factors, most of which were not considered in previous studies.<sup>27,28</sup>

The stratified analyses indicated that those who received less education, those who were physically active, non-smokers, former drinkers, and those without a history of stroke were more susceptible to the adverse impact of PM air pollution on dementia and MCI. One explanation for the substantial difference in the subgroup analysis is that a heightened baseline risk profile may mask additive effect from pollution,<sup>25</sup> and thus  $PM_{2.5}$  showed a stronger effect on dementia/MCI risk when patients had a lower risk of dementia/MCI. For example, it has been found in previous studies that people who exercise properly, have no history of cerebral infarction, do not smoke, and drink a little alcohol have a lower risk of dementia,<sup>29</sup> while  $PM_{2.5}$  has a stronger effect in these people. Cognitive reserve is an exception<sup>30</sup>; we found that people with higher cognitive reserve (associated with higher education) were less likely to be affected by  $PM_{2.5}$  levels. This may be related to the fact that cognitive reserve is a part of cognitive function, and people with higher overall cognitive reserve are less likely to progress to dementia/MCI even though their cognitive function may decline after exposure to  $PM_{2.5}$ .

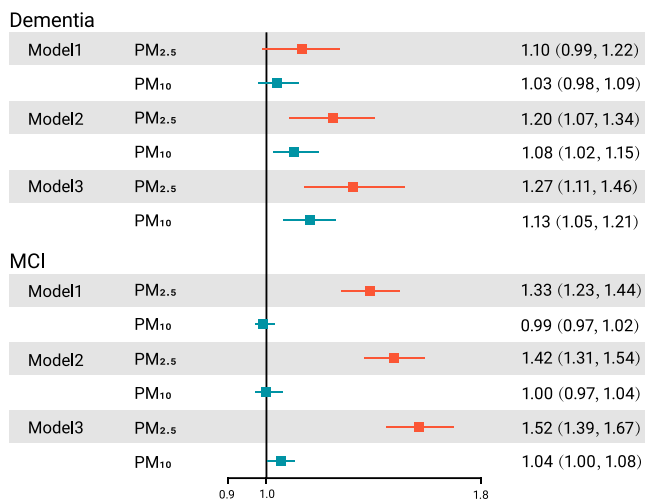

Figure 2. The ORs (and 95% CIs) of MCI and dementia associated with per-10  $\mu g/m^3$  increase in  $PM_{2.5}$  or  $PM_{10}$

**Table 2.** The results of stratified analyses for the modification effects on the association between PM pollution and dementia/MCI

| Factors                    | PM <sub>2.5</sub> (ORs and 95%CIs) <sup>a,b</sup> |                     | PM <sub>10</sub> (ORs and 95%CIs) <sup>a,b</sup> |                     |
|----------------------------|---------------------------------------------------|---------------------|--------------------------------------------------|---------------------|
|                            | MCI                                               | Dementia            | MCI                                              | Dementia            |
| <b>Age (years)</b>         |                                                   |                     |                                                  |                     |
| <80                        | 1.57 (1.29, 1.90)                                 | 1.02 (0.69, 1.49)   | 0.97 (0.92, 1.02)**                              | 1.02 (0.84, 1.24)   |
| ≥80                        | 1.51 (1.36, 1.67)                                 | 1.28 (1.11, 1.47)   | 1.07 (1.01, 1.12)                                | 1.13 (1.05, 1.22)   |
| <b>Years of education</b>  |                                                   |                     |                                                  |                     |
| ≤9                         | 1.62 (1.45, 1.81)*                                | 1.34 (1.14, 1.57)   | 1.03 (0.98, 1.08)                                | 1.12 (1.04, 1.22)   |
| >9                         | 1.33 (1.15, 1.54)                                 | 1.06 (0.83, 1.37)   | 1.04 (0.96, 1.12)                                | 1.12 (0.97, 1.28)   |
| <b>Physical activities</b> |                                                   |                     |                                                  |                     |
| Yes                        | 1.54 (1.40, 1.69)                                 | 1.37 (1.17, 1.61)** | 1.04 (0.99, 1.08)                                | 1.15 (1.06, 1.25)   |
| No                         | 1.42 (1.08, 1.87)                                 | 0.91 (0.70, 1.18)   | 1.04 (0.93, 1.17)                                | 1.04 (0.90, 1.21)   |
| <b>Social activities</b>   |                                                   |                     |                                                  |                     |
| Yes                        | 1.40 (1.22, 1.60)                                 | 1.09 (0.85, 1.40)   | 1.08 (1.01, 1.16)                                | 1.13 (0.99, 1.29)   |
| No                         | 1.63 (1.45, 1.84)                                 | 1.35 (1.15, 1.58)   | 1.01 (0.97, 1.04)                                | 1.12 (1.03, 1.22)   |
| <b>Smoking</b>             |                                                   |                     |                                                  |                     |
| Current <sup>c</sup>       | 1.47 (1.30, 1.66)                                 | 1.07 (0.90, 1.28)   | 1.02 (0.97, 1.07)                                | 1.06 (0.97, 1.16)   |
| Former <sup>c</sup>        | 1.61 (1.39, 1.86)                                 | 1.50 (1.20, 1.87)*  | 1.08 (1.01, 1.16)                                | 1.19 (1.07, 1.34)   |
| Never                      | 1.46 (1.07, 1.98)                                 | 1.73 (0.98, 3.04)   | 0.96 (0.87, 1.05)                                | 1.23 (0.93, 1.62)   |
| <b>Drinking</b>            |                                                   |                     |                                                  |                     |
| Current <sup>d</sup>       | 1.62 (1.19, 2.19)                                 | 1.66 (0.97, 2.86)   | 1.09 (0.95, 1.26)                                | 1.31 (1.00, 1.71)   |
| Former <sup>d</sup>        | 1.50 (1.26, 1.79)                                 | 1.61 (1.18, 2.21)*  | 1.08 (0.99, 1.18)                                | 1.53 (1.28, 1.84)** |
| Seldom <sup>d</sup>        | 1.41 (1.14, 1.74)                                 | 1.19 (0.88, 1.60)   | 1.08 (0.97, 1.20)                                | 1.05 (0.90, 1.24)   |
| Never                      | 1.58 (1.39, 1.80)                                 | 1.10 (0.91, 1.32)   | 1.00 (0.97, 1.04)                                | 1.01 (0.92, 1.10)   |
| <b>Diabetes mellitus</b>   |                                                   |                     |                                                  |                     |
| Yes                        | 1.58 (1.34, 1.88)                                 | 1.27 (0.99, 1.62)   | 1.10 (1.02, 1.20)                                | 1.07 (0.94, 1.21)   |
| No                         | 1.51 (1.36, 1.68)                                 | 1.26 (1.07, 1.48)   | 1.01 (0.97, 1.06)                                | 1.15 (1.06, 1.25)   |
| <b>Hypertension</b>        |                                                   |                     |                                                  |                     |
| Yes                        | 1.48 (1.33, 1.65)                                 | 1.26 (1.08, 1.48)   | 1.08 (1.02, 1.14)*                               | 1.16 (1.07, 1.26)   |
| No                         | 1.60 (1.35, 1.89)                                 | 1.26 (0.97, 1.63)   | 0.99 (0.95, 1.04)                                | 1.05 (0.92, 1.19)   |
| <b>Hyperlipidemia</b>      |                                                   |                     |                                                  |                     |
| Yes                        | 1.50 (1.31, 1.71)                                 | 1.42 (1.14, 1.76)   | 1.19 (1.11, 1.28)**                              | 1.24 (1.10, 1.40)*  |
| No                         | 1.53 (1.35, 1.72)                                 | 1.15 (0.97, 1.37)   | 0.97 (0.94, 1.00)                                | 1.05 (0.96, 1.14)   |
| <b>Cerebral infarction</b> |                                                   |                     |                                                  |                     |
| Yes                        | 1.16 (1.01, 1.33)**                               | 1.11 (0.90, 1.38)   | 1.02 (0.96, 1.08)                                | 1.02 (0.92, 1.14)   |
| No                         | 1.61 (1.46, 1.79)                                 | 1.34 (1.13, 1.58)   | 1.06 (1.01, 1.11)                                | 1.16 (1.07, 1.27)   |

\*p < 0.05 in the two-sample test. \*\*p < 0.01 in the two-sample test. Detailed results are shown in Table S3 in the supplemental information.

<sup>a</sup>Fully adjusted models controlling age, education years, smoking, drinking, family history of dementia, and history of NCDs. In all models, city was modeled as random effect. ORs and 95% CIs were associated with per-10 μg/m<sup>3</sup> increase in each pollutant.

<sup>b</sup>The significance of difference in effect estimates between different subgroups was examined using a two-sample test.

<sup>c</sup>The never-smoke group was set as the reference.

<sup>d</sup>The never-drink group was set as the reference.

The present study did not observe an effect modification by a history of other non-communicable diseases (NCDs), including cardiovascular disease, transient ischemic attack, depression, metabolic syndrome, chronic obstructive pulmonary disease (COPD), anemia, cataract, glaucoma, and hearing dis-

orders. Some of our results are comparable with those of previous studies. For example, Tzivian et al. found depression has no modification effect on the association between PM<sub>2.5</sub> and MCI,<sup>21</sup> consistent with our results, but also found that associations between PM<sub>2.5</sub> and MCI were stronger in

participants with no or moderate alcohol consumption than in those with high alcohol consumption, which is inconsistent with our findings. Other effect modifiers examined in this research have not been discussed in previous studies,<sup>21,28,31,32</sup> which limits the ability to make direct comparisons.

Although the biological mechanisms by which PM causes cognitive impairment are far from clear, some plausible mechanisms have been proposed. Several experiments in non-human animals and human postmortem studies have indicated that PM could infiltrate the brain through circulation or translocation via the olfactory nerve.<sup>33,34</sup> After penetration to the brain, PM may lead to systemic inflammation, oxidative stress, and a cascade of neuropathological changes. Such changes include the accumulation of amyloid- $\beta$ 42, the presence of hyperphosphorylated tau and neurofibrillary tangles, and neuroinflammation. The neuropathological changes may further lead to neural degeneration and cerebral atrophy, which are consistent with changes in the progression of Alzheimer disease, the most common type of dementia.<sup>5,7,33,35–37</sup> In addition, existing evidence suggests that PM-related cardiovascular and cerebrovascular disease may accelerate white matter loss, lower the total cerebral brain volume, and lead to more covert brain infarcts in older adults.<sup>14,38–40</sup> All of the above changes associated with PM exposure may contribute to cognitive impairment and the development of dementia or MCI among the elderly.

Some limitations of this study should be noted. The main limitation is that the cross-sectional study design prevented us from examining the causal effect of PM pollution on dementia or MCI. We were also not able to control for some potential confounding factors such as genetic information, coincident gaseous pollutants, and different occupations (work before retirement) due to the unavailability of these data. The spatial resolution of satellite-based exposure estimation could be improved by using new satellite-retrieved aerosol optical depth data.<sup>41,42</sup> With an improved spatial resolution of exposure assessment, ORs for PM<sub>2.5</sub> and PM<sub>10</sub> tend to be higher, due to more remarkable variations of individual-level exposure.<sup>43,44</sup> In this study, we used a bilinear interpolation method. The value of predicted PM<sub>2.5</sub> is the linear combination of four nearest 10-km grid cells (PM in sites 1–4) weighted by distance from the site to each of the grid cells, that is to say, 
$$\text{predicted PM}_{2.5} = \frac{1}{(d_1)^2} \text{PM}_{\text{site}1} + \frac{1}{(d_2)^2} \text{PM}_{\text{site}2} + \frac{1}{(d_3)^2} \text{PM}_{\text{site}3} + \frac{1}{(d_4)^2} \text{PM}_{\text{site}4}.$$
 Points located in the same grid cell are of varying distance to the four nearest 10-km grid cells, and thus points are typical of different weights. Therefore, points located in the same grid cell have different values of PM<sub>2.5</sub>. Apart from particle size, the source and chemical composition of PM play important roles in its health effects, but we were unable to consider these issues in this study due to the unavailability of the data. Moreover, this study only included male veterans, which limits the generalizability of the findings to other populations.

Despite the limitations described above, this study has several strengths compared with prior research in this area. First, the participants of this study are from veteran communities, which is a special population group including many old-old and oldest-old participants. Their residential places are stable and their living habits are very similar, which helps to reduce exposure misclassification and reduce unmeasured or residual confounding factors. Second, the clinical diagnoses of dementia or MCI in this study were based on the results of clinical examination and systematic neuropsychological tests. This effectively reduced the misdiagnosis of dementia or MCI compared with other studies in which the diagnosis relied only on the disease code or neuropsychological evaluations.<sup>45,46</sup> In addition, the large sample size of this study and the satellite-based estimation of PM in 18 cities ensures representativeness of the data and minimizes exposure misclassification.<sup>47</sup> Finally, due to the relatively high mean levels of participants' exposures to PM<sub>2.5</sub> and PM<sub>10</sub> (56.92  $\mu\text{g}/\text{m}^3$  and 102.71  $\mu\text{g}/\text{m}^3$ , respectively), this study provides evidence about the association between PM and dementia/MCI in more seriously polluted regions. Overall, to our knowledge, this is the first epidemiological study examining the association between long-term exposure to PM and MCI/dementia in China, and thus represents an important step in understanding the role of PM in cognitive impairment.

## Conclusion

Our study shows a significant association between PM air pollution exposure and development of dementia or MCI. This relationship was modified by the participant's educational level, physical activities, smoking and drinking habits, and prior incidence of cerebral infarction. Improvement of ambient air quality, especially PM<sub>2.5</sub>, is expected to help decrease the risk of dementia and MCI in the elderly. In addition to reducing the level of pollutants, it is also the future research direction to look for other interventional environmental factors to reduce the influence of PM on cognitive function.

## MATERIALS AND METHODS

### Study population

This multicenter cross-sectional survey was conducted using the CVCR platform, which was established to investigate the prevalence of NCDs among Chinese veterans from December 2009 to December 2011.<sup>48,49</sup> Participants were selected using a multi-stage cluster sampling method. In stage 1, from all areas where there are veteran communities, we chose three municipalities (Beijing, Tianjin, and Shanghai) and six provinces (Liaoning, Hebei, Shandong, Jiangsu, Fujian, and Guangdong) in the developed eastern region, and eight provinces (Heilongjiang, Inner Mongolia, Shanxi, Hubei, Shanxi, Gansu, Sichuan, and Guizhou) in the less developed central and western regions. In stage 2, we selected four first-tier cities (Beijing, Shanghai, Tianjin, and Guangzhou), five second-tier cities (Qingdao, Dalian, Fuzhou, Shijiazhuang, and Yantai), and one third-tier city (Baoding) in the developed eastern region, and eight second-tier cities (Wuhan, Xi'an, Chengdu, Harbin, Lanzhou, Taiyuan, Hohhot, and Guiyang) in the less developed central and western regions. In stage 3, veteran communities located in the selected cities participated in this platform. Finally, we selected all 277 veteran communities from 18 cities, covering 24.36% of all veteran communities in China. The veterans aged  $\geq 60$  years (or their legal representatives) in selected communities were investigated in this study. Community workers and veterans' spouses who were not veteran were excluded. The study was approved by the Institutional Review Board of the Chinese People's Liberation Army General Hospital and informed consent was obtained from each participant or their legal representative.

### Evaluation of dementia and mild cognitive impairment

All of the medical staff from the participating hospitals in the CVCR platform who have qualified to assess cognitive impairment through training performed a face-to-face, two-stage screening and diagnostic assessment of dementia and MCI with elderly participants in the clinics of veteran communities. The first phase was case screening, where we employed a series of rating scales to evaluate cognitive function, functional dependence, depressive symptoms, and sleep disorders for the eligible participants.<sup>48</sup> The scales we used included the Chinese version of the Mini-Mental State Examination (MMSE), the Montreal Cognitive Assessment (MoCA-P), Activities of Daily Living (ADL), and the Center for Epidemiological Studies Depression Scale (CED-S).<sup>50–54</sup>

The second phase was case evaluation. For the veterans whose scores in phase 1 indicated cognitive impairment, we implemented a comprehensive neuropsychological assessment of memory, language, visuospatial perception, calculation, abstract reasoning, and executive function. The assessments included paired-associate word learning of The Clinical Memory Test, episodic memory of modified Wechsler Memory Scale, category verbal fluency, the Clock Drawing Test, the trail-making test A of Halstead-Reitan Neuropsychological Battery for Adults, the symbol-digit modalities test, similarity and calculations of the Wechsler Adult Intelligence Scale, and Aphasia Battery of Chinese (ABC) test.<sup>55–61</sup> The spontaneous speech, auditory comprehension, repetition, and naming subtests from ABC were also used for language evaluations.<sup>61</sup> In addition, the Neuropsychiatric Inventory (NPI) and the Global Deterioration Scale (GDS) were used to evaluate the neuropsychiatric symptoms and severity of cognitive impairment.<sup>62</sup> All neuropsychological instruments used in this study have been validated in the Mandarin language among the Chinese population.<sup>50–62</sup> In addition to neuropsychological assessment, cases of dementia or MCI were further confirmed by a series of clinical examinations, including the collection of medical history, physical examinations, neurological assessments, laboratory tests (hepato-renal function, folic acid and vitamin B<sub>12</sub> levels, thyroid function test, and syphilis antibody test), and neuroimaging scan (computed tomography [CT] or magnetic resonance imaging [MRI]).

A clinical diagnosis of MCI was made using the core clinical criteria recommended by the National Institute on Aging and the Alzheimer's Association workgroup (NIA-AA): (1) cognitive decline compared with the participant's previous level (obtained from the subject or an informant); (2) impairment in one or more cognitive domains (the cutoff scores of neuropsychological tests were 1.5 SD below norms); (3) preservation of independence in functional abilities (ADL score  $< 26$ , GDS stage 2–3); and (4) not meeting the criteria for dementia.<sup>63</sup> The standard diagnostic criteria of dementia were in accordance with the Diagnostic and Statistical Manual of Mental Disorders IV (DSM-IV)<sup>64</sup>: impairment in one or more cognitive domains at a level of 2.5 SD or

more below norms, and impairment in daily and social functioning (ADL score  $\geq 26$ , GDS stage 4–7).

#### Data of PM air pollution/PM exposure assessment

Daily concentrations of PM<sub>2.5</sub> and PM<sub>10</sub> across China during the study period were estimated at a resolution of 0.1° ( $\approx 10$  km) using a machine learning method (random forest model) with ground monitoring data, satellite-retrieved aerosol optical depth, and information on other spatial and temporal predictors (see supplementary material). Satellite-based estimation was conducted as previously described.<sup>43,44</sup> We estimated participants' daily exposures to PM<sub>2.5</sub> and PM<sub>10</sub> according to their addresses (latitude and longitude) during the 3 years prior to the survey. Daily estimations were aggregated into the 3-year averages used in this study (see Figure S3 for additional sub-analyses of timescales for PM exposures). The results of 10-fold cross-validation (CV) showed the CV R<sup>2</sup> for estimated annual PM<sub>2.5</sub> and PM<sub>10</sub> concentrations were 86% and 81%, respectively (Table S1).

#### Measurement of potential covariates

A range of covariates were considered and adjusted for in our analyses. The socio-demographic characteristics collected included age, gender, and educational attainment. Education was measured in years of schooling, which includes both regular and adult education. In descriptive analyses, this was treated as a categorical variable for each individual: years of education  $>9$ , or years of education  $\leq 9$ . Behavioral factors were participation in regular physical and social activities (yes or no), smoking and alcohol consumption (current, former, or never a smoker/drinker). Current drinking was further divided into current drinking and current heavy drinking (average daily alcohol intake greater than five standard drink units) although there were no heavy drinkers found in this population. Physical activity was defined as doing physical exercise for at least 30 min every day at an intensity greater than or equal to walking. Social activity referred to participating in organized activities involving social contacts. Information about patient history of NCDs was also collected, including cardiovascular disease (angina pectoris, myocardial infarction, hypertension, arrhythmia), stroke (cerebral infarction or hemorrhage), transient ischemic attack, depression, metabolic syndrome including diabetes mellitus and hyperlipidemia, COPD, anemia, cataract, glaucoma, hearing disorders, and dementia. Data on sociodemographic factors, history of NCDs, and family history of neuropsychiatric diseases were collected through medical records in the community clinics or by face-to-face interviews conducted by the medical staff who performed dementia and MCI screening as described above.

#### Statistical analysis

We used logistic regression models to assess the associations of long-term exposure to PM with dementia and MCI. Due to a limited sample size ( $n = 321$ ), female cases were excluded. Our initial analyses showed that the associations between PM and dementia/MCI were linear (Figure S2). We therefore applied a linear function for PM in the analyses. Three models, which adjusted for different sets of confounding factors, were performed to estimate the associations of different levels of PM with dementia and MCI. Model 1 (referred to as the crude model) includes only one air pollutant (PM<sub>2.5</sub> or PM<sub>10</sub>). Model 2 (partially adjusted model) controls for age, years of education, smoking, and drinking. Model 3 (fully adjusted model) controls for age, years of education, smoking, drinking, family history of dementia, and history of NCDs other than dementia. In all models, the city was also incorporated as a random-effect term to control for the potential regional difference in the association between PM and dementia/MCI. Additional analyses were performed stratified by age, education, smoking, alcohol consumption, physical and social activity, history of diabetes mellitus, hypertension, hyperlipidemia, and cerebral infarction. An interaction term was added to the regression models to assess the significance of interactions. Participants with any of the above variables missing were excluded from the analysis.

#### REFERENCES

- Edelman, P., and Satcher, D. (1993). Violence prevention as a public health priority. *Health Aff.* **12**, 123–125.
- Gong, P., Liang, S., Carlton, E.J., et al. (2012). Urbanisation and health in China. *Lancet* **379**, 843–852.
- Patterson, C. (2016). Martin Prince, Adelina Comas-Herrera, Martin Knapp, et al. *World Alzheimer Report 2016: Improving healthcare for people living with dementia. Coverage, quality and costs now and in the future.* London, England: Alzheimer's Disease International.
- Porcelli, S., Calabro, M., Crisafulli, C., et al. (2019). Alzheimer's disease and neurotransmission gene variants: focus on their effects on psychiatric comorbidities and inflammatory parameters. *Neuropsychobiology* **78**, 79–85.
- Moulton, P.V., and Yang, W. (2012). Air pollution, oxidative stress, and Alzheimer's disease. *J. Environ. Public Health* **2012**, 472751.
- Heusinkveld, H.J., Wahle, T., Campbell, A., et al. (2016). Neurodegenerative and neurological disorders by small inhaled particles. *Neurotoxicology* **56**, 94–106.
- Calderon-Garciduenas, L., Reed, W., Maronpot, R.R., et al. (2004). Brain inflammation and Alzheimer's-like pathology in individuals exposed to severe air pollution. *Toxicol. Pathol.* **32**, 650–658.
- Jayaraj, R.L., Rodriguez, E.A., Wang, Y., and Block, M.L. (2017). Outdoor ambient air pollution and neurodegenerative diseases: the neuroinflammation hypothesis. *Curr. Environ. Health Rep.* **4**, 166–179.
- Calderón-Garcidueñas, L., and de la Monte, S.M. (2017). Apolipoprotein E4, gender, body mass index, inflammation, insulin resistance, and air pollution interactions: recipe for Alzheimer's disease development in Mexico city young females. *J. Alzheimers Dis.* **58**, 613–630.
- Oudin, A., Forsberg, B., Adolfsson, A.N., et al. (2016). Traffic-related air pollution and dementia incidence in northern Sweden: a longitudinal study. *Environ. Health Perspect.* **124**, 306–312.
- Calderón-Garcidueñas, L., and Villarreal-Ríos, R. (2017). Living close to heavy traffic roads, air pollution, and dementia. *Lancet* **389**, 675–677.
- Bourdrel, T., Bind, M.A., Bejot, Y., et al. (2017). Cardiovascular effects of air pollution. *Arch. Cardiovasc. Dis.* **110**, 634–642.
- Crichton, S., Barratt, B., Spiridou, A., et al. (2016). Associations between exhaust and non-exhaust particulate matter and stroke incidence by stroke subtype in south London. *Sci. Total Environ.* **568**, 278–284.
- Hoek, G., Krishnan, R.M., Beelen, R., et al. (2013). Long-term air pollution exposure and cardio-respiratory mortality: a review. *J. Environ. Health Perspect.* **121**, 43.
- Yang, Y., Qi, J., Ruan, Z., et al. (2020). Changes in life expectancy of respiratory diseases from attaining daily PM<sub>2.5</sub> standard in China: a nationwide observational study. *Innovation* **1**, 100064.
- Russ, T.C., Reis, S., and van Tongeren, M. (2019). Air pollution and brain health: defining the research agenda. *Curr. Opin. Psychiatry* **32**, 97–104.
- Paul, K.C., Haan, M., Mayeda, E.R., and Ritz, B.R. (2019). Ambient air pollution, noise, and late-life cognitive decline and dementia risk. *Annu. Rev. Public Health* **40**, 203–220.
- Peters, R., Ee, N., Peters, J., et al. (2019). Air pollution and dementia: a systematic review. *J. Alzheimers Dis.* **70**, S145–S163.
- Jung, C.R., Lin, Y.T., and Hwang, B.F. (2015). Ozone, particulate matter, and newly diagnosed Alzheimer's disease: a population-based cohort study in Taiwan. *J. Alzheimers Dis.* **44**, 573–584.
- Ranf, U., Schikowski, T., Sugiri, D., et al. (2009). Long-term exposure to traffic-related particulate matter impairs cognitive function in the elderly. *J. Environ. Res.* **109**, 1004–1011.
- Tzivian, L., Dlugaj, M., Winkler, A., et al. (2016). Long-term air pollution and traffic noise exposures and mild cognitive impairment in older adults: a cross-sectional analysis of the Heinz Nixdorf recall study. *Environ. Health Perspect.* **124**, 1361–1368.
- Wu, Y.C., Lin, Y.C., Yu, H.L., et al. (2015). Association between air pollutants and dementia risk in the elderly. *J. Alzheimers Dement. (Amst.)* **7**, 220–228.
- Oudin, A., Segersson, D., Adolfsson, R., and Forsberg, B. (2018). Association between air pollution from residential wood burning and dementia incidence in a longitudinal study in northern Sweden. *PLoS One* **13**, e0198283.
- Chen, H., Kwong, J.C., Copes, R., et al. (2017). Living near major roads and the incidence of dementia, Parkinson's disease, and multiple sclerosis: a population-based cohort study. *Lancet* **389**, 718–726.
- Loop, M.S., Kent, S.T., Al-Hamdan, M.Z., et al. (2013). Fine particulate matter and incident cognitive impairment in the REasons for Geographic and Racial Differences in Stroke (REGARDS) cohort. *J. PLoS One* **8**, e75001.
- Schikowski, T., Vossoughi, M., Vierkötter, A., et al. (2015). Association of air pollution with cognitive functions and its modification by APOE gene variants in elderly women. *J. Environ. Res.* **142**, 10–16.
- Ailshire, J.A., and Clarke, P. (2015). Fine particulate matter air pollution and cognitive function among U.S. older adults. *J. Gerontol. B Psychol. Sci. Soc. Sci.* **70**, 322–328.
- Ailshire, J.A., and Crimmins, E.M. (2014). Fine particulate matter air pollution and cognitive function among older US adults. *Am. J. Epidemiol.* **180**, 359–366.
- Baumgart, M., Snyder, H.M., Carrillo, M.C., et al. Summary of the evidence on modifiable risk factors for cognitive decline and dementia: a population-based perspective. *Alzheimers Dement.* **11**, 718–726.
- Amanollahi, M., Amanollahi, S., Anjomshoa, A., and Dolatshahi, M. (2021). Mitigating the negative impacts of aging on cognitive function: modifiable factors associated with increasing cognitive reserve. *Eur. J. Neurosci.* **53**, 3109–3124.
- Chen, R., Wilson, K., Chen, Y., et al. (2013). Association between environmental tobacco smoke exposure and dementia syndromes. *Occup. Environ. Med.* **70**, 63–69.
- Orsitto, G., Turi, V., Venezia, A., et al. (2012). Relation of secondhand smoking to mild cognitive impairment in older inpatients. *ScientificWorldJournal* **2012**, 726948.
- Block, M.L., Elder, A., Auten, R.L., et al. (2012). The outdoor air pollution and brain health workshop. *Neurotoxicology* **33**, 972–984.
- Calderón-Garcidueñas, L., Solt, A.C., Henríquez-Roldán, C., et al. (2008). Long-term air pollution exposure is associated with neuroinflammation, an altered innate immune response, disruption of the blood-brain barrier, ultrafine particulate deposition, and

- accumulation of amyloid beta-42 and alpha-synuclein in children and young adults. *Toxicol. Pathol.* **36**, 289–310.
35. Calderón-Garcidueñas, L., Mora-Tiscareño, A., Ontiveros, E., et al. (2008). Air pollution, cognitive deficits and brain abnormalities: a pilot study with children and dogs. *J. Brain Cogn.* **68**, 117–127.
  36. Block, M.L., and Calderón-Garcidueñas, L. (2009). Air pollution: mechanisms of neuro-inflammation and CNS disease. *Trends Neurosci.* **32**, 506–516.
  37. Kim, S.H., Knight, E.M., Saunders, E.L., et al. (2012). Rapid doubling of Alzheimer's amyloid- $\beta$ 40 and 42 levels in brains of mice exposed to a nickel nanoparticle model of air pollution. *F. Res.* **1**, 70.
  38. Cesaroni, G., Forastiere, F., Stafoggia, M., et al. (2014). Long term exposure to ambient air pollution and incidence of acute coronary events: prospective cohort study and meta-analysis in 11 European cohorts from the ESCAPE project. *BMJ* **348**, f7412.
  39. Künzli, N., Perez, L., von Klot, S., et al. (2011). Investigating air pollution and atherosclerosis in humans: concepts and outlook. *Prog. Cardiovasc. Dis.* **53**, 334–343.
  40. Wilker, E.H., Preis, S.R., Beiser, A.S., et al. (2015). Long-term exposure to fine particulate matter, residential proximity to major roads and measures of brain structure. *Stroke* **46**, 1161–1166.
  41. Di, Q., Amini, H., Shi, L., et al. (2019). An ensemble-based model of PM<sub>2.5</sub> concentration across the contiguous United States with high spatiotemporal resolution. *Environ. Int.* **130**, 104909.
  42. Wei, J., Li, Z., Cribb, M., et al. (2020). Improved 1 km resolution PM<sub>2.5</sub> estimates across China using enhanced space-time extremely randomized trees. *Atmos. Chem. Phys.* **20**, 3273–3289.
  43. Chen, G., Li, S., Knibbs, L.D., et al. (2018). A machine learning method to estimate PM<sub>2.5</sub> concentrations across China with remote sensing, meteorological and land use information. *Sci. Total Environ.* **636**, 52–60.
  44. Chen, G., Wang, Y., Li, S., et al. (2018). Spatiotemporal patterns of PM<sub>10</sub> concentrations over China during 2005–2016: a satellite-based estimation using the random forests approach. *Environ. Pollut.* **242**, 605–613.
  45. Power, M.C., Adar, S.D., Yanosky, J.D., and Weuve, J. (2016). Exposure to air pollution as a potential contributor to cognitive function, cognitive decline, brain imaging, and dementia: a systematic review of epidemiologic research. *Neurotoxicology* **56**, 235–253.
  46. Salinas-Rodriguez, A., Fernandez-Nino, J.A., Manrique-Espinoza, B., et al. (2018). Exposure to ambient PM<sub>2.5</sub> concentrations and cognitive function among older Mexican adults. *Environ. Int.* **117**, 1–9.
  47. Chen, G., Wang, A., Li, S., et al. (2019). Long-term exposure to air pollution and survival after ischemic stroke: the China National Stroke Registry cohort. *Stroke* **50**, 563–570.
  48. Tan, J., Li, N., Gao, J., et al. (2014). Construction of the Chinese Veteran Clinical Research (CVCR) platform for the assessment of non-communicable diseases. *Chin Med. J. (Engl.)* **127**, 448–456.
  49. Tan, J., Li, N., Gao, J., et al. (2015). Optimal cutoff scores for dementia and mild cognitive impairment of the Montreal Cognitive Assessment among elderly and oldest-old Chinese population. *J. Alzheimers Dis.* **43**, 1403–1412.
  50. Nasreddine, Z.S., Phillips, N.A., Bedirian, V., et al. (2005). The Montreal Cognitive Assessment, MoCA: a brief screening tool for mild cognitive impairment. *J. Am. Geriatr. Soc.* **53**, 695–699.
  51. Zhang, M., Yu, E., and He, Y. (1995). Tools for dementia epidemiological investigations and their applications. *Shanghai Arch. Psychiatry* **7**, 1–62, [Chinese].
  52. Zhang, Z., Hong, X., and Li, H. (1999). The mini-mental state examination in the Chinese residents population aged 55 years and over in the urban and rural areas of Beijing. *Chin. J. Neurol.* **32**, 149–153, [Chinese].
  53. Wu, W., Zhang, M., Yu, Q., et al. (1989). The applications of the Center for Epidemiological Studies Depression Scale (CES-D) among the elderly population in the communities. *J. Shanghai Arch. Psychol.* **7**, 139–142, [Chinese].
  54. Li, H., Wang, Y., Huang, S., et al. (2009). Application of Montreal Cognitive Assessment in screening mild cognitive impairment in elderly patients. *Zhonghua Shen Jing Yi Xue Za Zhi* **8**, 376–379, [Chinese].
  55. Gong, Y., Jiang, D., and Deng, J. (1989). Manual of Modified Wechsler Memory Scale (WMS) (Hunan Med College), [Chinese].
  56. Guo, Q.H., Jin, L.L., and Hong, Z. (2007). A specific phenomenon of animal fluency test in Chinese elderly. *Chin J. Ment. Health* **21**, 622–625, [Chinese].
  57. Gong, Y. (1986). The Chinese revision of Halstead-Reitan neuropsychological test battery for adults. *Acta Psychol. Sin.* **4**, 433–442, [Chinese].
  58. Gong, Y. (1982). Manual of Modified Wechsler Adult Intelligence Scale (WAIS-RC) (Hunan Med College), [Chinese].
  59. The Clinical Memory Test (CMT) group (1986). The construction of “the clinical memory test”. *Acta Psychol. Sin.* **1**, 100–108, [Chinese].
  60. Meng, C., Z. X., Wang, H., et al. (2004). The clock drawing test for detecting cognitive impairment. *Chin J. Nerv Ment. Dis.* **6**, 452–454, [Chinese].
  61. Gao, S.R. (2006). Aphasia (Peking University Medical Press), [Chinese].
  62. Xie, H.G., Wang, L.N., Yu, X., et al. (2004). Neuropsychiatric symptoms in dementia and elderly people in the community: results from the Beijing Dementia Cooperative Study. *Zhonghua Liu Xing Bing Xue Za Zhi* **25**, 829–832, [Chinese].
  63. Albert, M.S., DeKosky, S.T., Dickson, D., et al. (2011). The diagnosis of mild cognitive impairment due to Alzheimer's disease: recommendations from the National Institute on Aging-Alzheimer's Association workgroups on diagnostic guidelines for Alzheimer's disease. *Alzheimers Dement.* **7**, 270–279.
  64. American Psychiatric Association (1994). *Diagnostic and Statistical Manual of Mental Disorders* (American Psychiatric Association).

#### ACKNOWLEDGMENTS

This work was supported by Special Research Project on Health Care, Health Sector of the General Logistics Department of Peoples Liberation Army (project numbers: 07BJZ04, 10BJZ19, 11BJZ09, and 12BJZ46), the National Natural Science Foundation of China (project number: 81701067) and the National Science and Technology Support Program (project number: 2013BAI09B14). S.L. was supported by an Early Career Fellowship of the Australian National Health and Medical Research Council (APP1109193). Y.G. was supported by Career Development Fellowships of the Australian National Health and Medical Research Council (APP1163693).

#### AUTHOR CONTRIBUTIONS

J.T. designed and carried out the study, collected the data, and reviewed and revised the manuscript. N.L. and X.W. conducted the statistical analysis and drafted, reviewed, and revised the manuscript. G.C. conducted satellite-based estimation. L.Y. and Y.Z. critically reviewed and revised the manuscript. S.L. conducted the map drawing work. L.-n.W. and Y.G. conceptualized and designed the study, coordinated and supervised the data collection, and critically reviewed and revised the manuscript.

#### DECLARATION OF INTERESTS

The authors declare no competing interests.

#### LEAD CONTACT WEBSITE

<https://research.monash.edu/en/persons/yuming-guo>

#### SUPPLEMENTAL INFORMATION

Supplemental information can be found online at <https://doi.org/10.1016/j.xinn.2021.100147>.



**The Innovation, Volume 2**

**Supplemental Information**

**Associations of particulate matter**

**with dementia and mild cognitive impairment in China:**

**A multicenter cross-sectional study**

**Jiping Tan, Nan Li, Xiaoxiao Wang, Gongbo Chen, Lailai Yan, Luning Wang, Yiming Zhao, Shanshan Li, and Yuming Guo**

## Supplementary Material

### Estimating concentrations of PM<sub>2.5</sub> and PM<sub>10</sub>

#### *a. Data downloading and processing*

Daily concentrations of PM<sub>2.5</sub> and PM<sub>10</sub> over China during 2005-2016 were estimated using MODIS AOD, meteorological data, land use information and other predictors. More details about the data downloading and processing were previously reported (Chen et al., 2018a; Chen et al., 2018b). Daily ground measurements of PM<sub>2.5</sub> and PM<sub>10</sub> were obtained from 1479 stations of the China National Environmental Monitoring Center (CNEMC) from May 2014 to December 2016.

#### *b. Model development*

We used a machine learning method (random forests) for model development and prediction. This method is user-friendly, as there is no need to define the complex relationships between predictors (e.g., linear or nonlinear relationships and interactions) and the variable importance measures provided by random forests help user to identify important variables and noise variables (Hu et al., 2017). The final model is shown as following:

$$PM_{ij} = AOD_{ij} + TEMP_{ij} + RH_{ij} + BP_{ij} + WS_{ij} + NDVI + Urban\_cover + doy + \log(elev)$$

where  $PM_{2.5ij}$  is the PM<sub>2.5</sub> or PM<sub>10</sub> on day  $i$  at station  $j$ ;  $AOD_{ij}$  is the combined AOD;  $TEMP$ ,  $RH$ ,  $BP$  and  $WS$  are mean temperature, relative humidity, barometric pressure and wind speed on day  $i$ , respectively;  $NDVI$  is the monthly average NDVI value;  $Urban\_cover$  is the percentage of urban cover with a buffer radius of 10 km;  $doy$  is day of the year;  $\log(elev)$  is the log transformed elevation.

#### *c. Model validation and prediction*

To evaluate the predictive ability of the final model, a 10-fold cross-validation (CV) was performed. The results are shown in Table S1.

**Table S1. Results of 10-fold cross-validation for PM<sub>1</sub>, PM<sub>2.5</sub>, PM<sub>10</sub> and NO<sub>2</sub>**

| Pollutants        | Daily model       |                        | Annual averages   |                        |
|-------------------|-------------------|------------------------|-------------------|------------------------|
|                   | CV R <sup>2</sup> | RMSE                   | CV R <sup>2</sup> | RMSE                   |
| PM <sub>2.5</sub> | 83%               | 18.1 µg/m <sup>3</sup> | 86%               | 6.9 µg/m <sup>3</sup>  |
| PM <sub>10</sub>  | 78%               | 31.5 µg/m <sup>3</sup> | 81%               | 14.4 µg/m <sup>3</sup> |

The final random forests models were used to predict daily concentration of air pollutants in China. A 0.1-degree ( $\approx 10$  km) grid (including around 96,103 grid cells) covering the entire China was created for data integration and prediction. Daily concentrations of PM<sub>2.5</sub> and PM<sub>10</sub> were estimated for each grid cell during the study period. Predicted daily concentrations were aggregated into annual averages.

**References:**

- Chen, G., Knibbs, L.D., Zhang, W., Li, S., Cao, W., Guo, J., Ren, H., Wang, B., Wang, H., Williams, G., Hamm, N.A.S., Guo, Y., 2018a. Estimating spatiotemporal distribution of PM1 concentrations in China with satellite remote sensing, meteorology, and land use information. *Environmental Pollution* 233, 1086-1094.
- Chen, G., Li, S., Knibbs, L.D., Hamm, N.A.S., Cao, W., Li, T., Guo, J., Ren, H., Abramson, M.J., Guo, Y., 2018b. A machine learning method to estimate PM2.5 concentrations across China with remote sensing, meteorological and land use information. *Science of the Total Environment* 636, 52-60.
- Hu, X., Belle, J.H., Meng, X., Wildani, A., Waller, L., Strickland, M., Liu, Y., 2017. Estimating PM2.5 Concentrations in the Conterminous United States Using the Random Forest Approach. *Environ Sci Technol*.

**Supplementary Tables and Figures****Table S2 . The comparison about the prevalence of dementia of Chinese male veterans (our study) and ordinary population**

|       | Prevalence of dementia of ordinary population (%) | Number of male veterans | Expected number of dementia veterans | Observed number of dementia veterans |
|-------|---------------------------------------------------|-------------------------|--------------------------------------|--------------------------------------|
| 60-64 | 1.35                                              | 40                      | 1                                    | 0                                    |
| 65-69 | 2.58                                              | 45                      | 1                                    | 0                                    |
| 70-74 | 4.76                                              | 109                     | 5                                    | 4                                    |
| 75-79 | 8.5                                               | 1830                    | 156                                  | 94                                   |
| 80-84 | 14.63                                             | 3501                    | 512                                  | 459                                  |
| 85-89 | 24.32                                             | 1246                    | 303                                  | 295                                  |
| 90-94 | 39.03                                             | 179                     | 70                                   | 60                                   |
| >=95  | 60.47                                             | 20                      | 12                                   | 9                                    |
| Total | —                                                 | 6970 <sup>a</sup>       | 1060                                 | 921                                  |

<sup>a</sup>: The age data of 70 participants were missing. Data from 6,970 male veterans were included in the analysis after these missing data were excluded.

**Table S3. A summary of included and excluded participants' exposure to PM<sub>2.5</sub> and PM<sub>10</sub> (µg/m<sup>3</sup>) during the three years prior to the survey.**

| Pollutants        | Participants | n    | Mean   | Min   | Percentiles |        |        | Max    | SMD <sup>a</sup> |
|-------------------|--------------|------|--------|-------|-------------|--------|--------|--------|------------------|
|                   |              |      |        |       | 25%         | 50%    | 75%    |        |                  |
| PM <sub>2.5</sub> | Included     | 7040 | 56.92  | 30.46 | 48.15       | 55.21  | 71.46  | 84.23  | 0.036            |
|                   | Excluded     | 2636 | 56.44  | 30.46 | 47.04       | 54.89  | 66.13  | 84.23  |                  |
| PM <sub>10</sub>  | Included     | 7040 | 102.71 | 53.38 | 83.68       | 100.16 | 128.34 | 143.14 | 0.094            |
|                   | Excluded     | 2636 | 100.43 | 53.38 | 83.05       | 100.15 | 122.31 | 143.14 |                  |

**a: standardised mean difference between included and excluded participants.**

**Table S4 (single-pollutant model). The ORs (and 95% CIs) of MCI and dementia associated with per 10 µg/m<sup>3</sup> increase in PM.**

|                                   | MCI               | Dementia          |
|-----------------------------------|-------------------|-------------------|
| PM <sub>2.5</sub> <sup>a</sup>    | 1.52 (1.39, 1.67) | 1.27 (1.11, 1.46) |
| PM <sub>10</sub> <sup>a</sup>     | 1.04 (1.00, 1.08) | 1.13 (1.05, 1.21) |
| PM <sub>10-2.5</sub> <sup>a</sup> | 0.88 (0.84, 0.93) | 1.12 (1.01, 1.23) |

<sup>a</sup>: Adjusted for age, education years, smoking, drinking, family history of dementia, and history of NCDs. And city was modeled as random effect.

**Table S5 (two-pollutant model). The ORs (and 95% CIs) of MCI and dementia associated with per 10 µg/m<sup>3</sup> increase in PM and per 1 % increase in PM<sub>2.5</sub> / PM<sub>10</sub> ratio.**

|                                     | MCI               | Dementia          |
|-------------------------------------|-------------------|-------------------|
| PM <sub>10</sub>                    | 1.19 (1.13, 1.25) | 1.16 (1.07, 1.25) |
| PM <sub>2.5</sub> /PM <sub>10</sub> | 2.13 (1.86, 2.44) | 1.15 (0.96, 1.39) |

Adjusted for age, education years, smoking, drinking, family history of dementia, and history of NCDs. And city was modeled as random effect.

**Table S6. Male veterans participating in the CVCR Platform**

| Cities       | Male veterans screened | Included in this study |
|--------------|------------------------|------------------------|
| Beijing      | 1234                   | 1008                   |
| Shijiazhuang | 1011                   | 837                    |
| Dalian       | 881                    | 567                    |
| Lanzhou      | 447                    | 394                    |
| Yantai       | 457                    | 341                    |
| Qingdao      | 589                    | 492                    |
| Fuzhou       | 488                    | 457                    |
| Chengdu      | 493                    | 405                    |
| Guangzhou    | 530                    | 423                    |
| Wuhan        | 147                    | 111                    |

|          |      |      |
|----------|------|------|
| Shanghai | 720  | 416  |
| Xi 'an   | 677  | 537  |
| Tianjin  | 385  | 218  |
| Baoding  | 201  | 155  |
| Hohhot   | 189  | 175  |
| Taiyuan  | 254  | 197  |
| Guiyang  | 216  | 165  |
| Harbin   | 177  | 142  |
| Total    | 9096 | 7040 |

**Table S7. The ORs (and 95% CIs) of MCI and dementia associated with personal hobbies**

| Personal hobbies                  | MCI              |              | Dementia         |                  |
|-----------------------------------|------------------|--------------|------------------|------------------|
|                                   | OR (95% CI)      | P            | OR (95% CI)      | P                |
| Calligraphy                       | 0.87 (0.74,1.03) | 0.105        | 0.89 (0.66,1.20) | 0.442            |
| Painting                          | 1.24 (0.98,1.56) | 0.077        | 1.16 (0.75,1.81) | 0.510            |
| Photography                       | 0.81 (0.65,1.02) | 0.067        | 0.78 (0.50,1.24) | 0.296            |
| Collecting                        | 0.79 (0.63,1.00) | <b>0.045</b> | 0.65 (0.40,1.05) | 0.077            |
| Gardening                         | 1.10 (0.96,1.25) | 0.174        | 0.71 (0.57,0.90) | <b>0.005</b>     |
| Pet keeping                       | 1.17 (0.99,1.38) | 0.069        | 1.14 (0.83,1.55) | 0.420            |
| Handicraft                        | 0.66 (0.47,0.92) | <b>0.015</b> | 0.61 (0.32,1.15) | 0.125            |
| Reading                           | 0.71 (0.54,0.94) | <b>0.017</b> | 0.41 (0.29,0.58) | <b>&lt;0.001</b> |
| Keeping a diary                   | 1.14 (0.94,1.38) | 0.176        | 0.53 (0.34,0.82) | <b>0.005</b>     |
| Writing articles                  | 1.02 (0.87,1.20) | 0.816        | 0.78 (0.57,1.07) | 0.120            |
| TV watching or listening to radio | 1.24 (0.88,1.74) | 0.213        | 0.79 (0.52,1.21) | 0.279            |
| Playing cards or mahjong          | 1.05 (0.92,1.20) | 0.479        | 0.82 (0.65,1.04) | 0.099            |

controlling for age, education years, smoking, drinking, family history of dementia, and history of NCDs.

**Table S8. The ORs (and 95% CIs) of MCI and dementia associated with per 10  $\mu\text{g}/\text{m}^3$  increase in  $\text{PM}_{2.5}$  or  $\text{PM}_{10}$ .**

| Models               | $\text{PM}_{2.5}$ (ORs and 95% CIs) |                   | $\text{PM}_{10}$ (ORs and 95% CIs) |                   |
|----------------------|-------------------------------------|-------------------|------------------------------------|-------------------|
|                      | MCI                                 | Dementia          | MCI                                | Dementia          |
| Model 1 <sup>a</sup> | 1.33 (1.23, 1.44)                   | 1.10 (0.99, 1.22) | 0.99 (0.97, 1.02)                  | 1.03 (0.98, 1.09) |
| Model 2 <sup>b</sup> | 1.42 (1.31, 1.54)                   | 1.20 (1.07, 1.34) | 1.00 (0.97, 1.04)                  | 1.08 (1.02, 1.15) |
| Model 3 <sup>c</sup> | 1.52 (1.39, 1.67)                   | 1.27 (1.11, 1.46) | 1.04 (1.00, 1.08)                  | 1.13 (1.05, 1.21) |
| Model 4 <sup>d</sup> | 1.55 (1.42, 1.70)                   | 1.28 (1.11, 1.47) | 1.04 (1.00, 1.09)                  | 1.11 (1.03, 1.19) |

<sup>a</sup>: Model 1, a crude model including only one air pollutant; <sup>b</sup>: Model 2, an adjusted model controlling age, education years, smoking and drinking; <sup>c</sup>: Model 3, an adjusted model controlling age, education years, smoking, drinking, family history of dementia, and history of NCDs. <sup>d</sup>: an adjusted model controlling age, education years, smoking, drinking, family history of dementia, history of NCDs, and personal hobbies. In all models, city was modeled as random effect.

**Table S9. Analysis of modification effects of several factors on the association between PM and MCI or dementia**

| Factors              | PM <sub>2.5</sub> <sup>ab</sup> |        |              |                   |        |              | PM <sub>10</sub> (ORs and 95% CIs) <sup>ab</sup> |        |              |                   |        |              |
|----------------------|---------------------------------|--------|--------------|-------------------|--------|--------------|--------------------------------------------------|--------|--------------|-------------------|--------|--------------|
|                      | MCI                             |        |              | Dementia          |        |              | MCI                                              |        |              | Dementia          |        |              |
|                      | OR (95%CI)                      | z      | p            | OR (95%CI)        | z      | p            | OR (95%CI)                                       | z      | p            | OR (95%CI)        | z      | p            |
| Age (years)          |                                 |        |              |                   |        |              |                                                  |        |              |                   |        |              |
| < 80                 | 1.57 (1.29, 1.90)               | 0.356  | 0.722        | 1.02 (0.69, 1.49) | -1.109 | 0.267        | 0.97 (0.92, 1.02)                                | -2.674 | <b>0.008</b> | 1.02 (0.84, 1.24) | -0.919 | 0.358        |
| ≥80                  | 1.51 (1.36, 1.67)               |        |              | 1.28 (1.11, 1.47) |        |              | 1.07 (1.01, 1.12)                                |        |              | 1.13 (1.05, 1.22) |        |              |
| Years of education   |                                 |        |              |                   |        |              |                                                  |        |              |                   |        |              |
| ≤9                   | 1.62 (1.45, 1.81)               | -2.105 | <b>0.035</b> | 1.34 (1.14, 1.57) | -1.537 | 0.124        | 1.03 (0.98, 1.08)                                | 0.137  | 0.891        | 1.12 (1.04, 1.22) | -0.083 | 0.934        |
| > 9                  | 1.33 (1.15, 1.54)               |        |              | 1.06 (0.83, 1.37) |        |              | 1.04 (0.96, 1.12)                                |        |              | 1.12 (0.97, 1.28) |        |              |
| Physical activities  |                                 |        |              |                   |        |              |                                                  |        |              |                   |        |              |
| Yes                  | 1.54 (1.40, 1.69)               | 0.509  | 0.611        | 1.37 (1.17, 1.61) | 2.636  | <b>0.008</b> | 1.04 (0.99, 1.08)                                | -0.070 | 0.945        | 1.15 (1.06, 1.25) | 1.089  | 0.276        |
| No                   | 1.42 (1.08, 1.87)               |        |              | 0.91 (0.70, 1.18) |        |              | 1.04 (0.93, 1.17)                                |        |              | 1.04 (0.90, 1.21) |        |              |
| Social activities    |                                 |        |              |                   |        |              |                                                  |        |              |                   |        |              |
| Yes                  | 1.40 (1.22, 1.60)               | -1.634 | 0.102        | 1.09 (0.85, 1.40) | -1.405 | 0.160        | 1.08 (1.01, 1.16)                                | 1.837  | 0.066        | 1.13 (0.99, 1.29) | 0.111  | 0.911        |
| No                   | 1.63 (1.45, 1.84)               |        |              | 1.35 (1.15, 1.58) |        |              | 1.01 (0.97, 1.04)                                |        |              | 1.12 (1.03, 1.22) |        |              |
| Smoking              |                                 |        |              |                   |        |              |                                                  |        |              |                   |        |              |
| Current <sup>c</sup> | 1.47 (1.30, 1.66)               | -0.041 | 0.968        | 1.07 (0.9, 1.28)  | 1.577  | 0.115        | 1.02 (0.97, 1.07)                                | -1.174 | 0.241        | 1.06 (0.97, 1.16) | 1.004  | 0.316        |
| Former <sup>c</sup>  | 1.61 (1.39, 1.86)               | 0.922  | 0.356        | 1.50 (1.20, 1.87) | 2.290  | 0.022        | 1.08 (1.01, 1.16)                                | 1.375  | 0.169        | 1.19 (1.07, 1.34) | 1.592  | 0.111        |
| Never                | 1.46 (1.07, 1.98)               | -      | -            | 1.73 (0.98, 3.04) | -      | -            | 0.96 (0.87, 1.05)                                | -      | -            | 1.23 (0.93, 1.62) | -      | -            |
| Drinking             |                                 |        |              |                   |        |              |                                                  |        |              |                   |        |              |
| Current <sup>d</sup> | 1.62 (1.19, 2.19)               | 0.144  | 0.885        | 1.66 (0.97, 2.86) | 1.413  | 0.158        | 1.09 (0.95, 1.26)                                | 1.118  | 0.264        | 1.31 (1.00, 1.71) | 1.796  | 0.072        |
| Former <sup>d</sup>  | 1.50 (1.26, 1.79)               | -0.461 | 0.645        | 1.61 (1.18, 2.21) | 2.051  | <b>0.040</b> | 1.08 (0.99, 1.18)                                | 1.531  | 0.126        | 1.53 (1.28, 1.84) | 4.019  | <b>0.000</b> |
| Seldom <sup>d</sup>  | 1.41 (1.14, 1.74)               | -0.909 | 0.364        | 1.19 (0.88, 1.60) | 0.429  | 0.668        | 1.08 (0.97, 1.20)                                | 1.210  | 0.226        | 1.05 (0.90, 1.24) | 0.485  | 0.628        |
| Never                | 1.58 (1.39, 1.80)               | -      | -            | 1.10 (0.91, 1.32) | -      | -            | 1.00 (0.97, 1.04)                                | -      | -            | 1.01 (0.92, 1.10) | -      | -            |
| Diabetes mellitus    |                                 |        |              |                   |        |              |                                                  |        |              |                   |        |              |
| Yes                  | 1.58 (1.34, 1.88)               | 0.447  | 0.655        | 1.27 (0.99, 1.62) | 0.071  | 0.944        | 1.10 (1.02, 1.20)                                | 1.742  | 0.081        | 1.07 (0.94, 1.21) | -0.985 | 0.325        |

|                     |     |                   |        |              |                   |        |       |                   |        |              |                   |        |              |
|---------------------|-----|-------------------|--------|--------------|-------------------|--------|-------|-------------------|--------|--------------|-------------------|--------|--------------|
| Hypertension        | No  | 1.51 (1.36, 1.68) |        |              | 1.26 (1.07, 1.48) |        |       | 1.01 (0.97, 1.06) |        |              | 1.15 (1.06, 1.25) |        |              |
|                     | Yes | 1.48 (1.33, 1.65) | -0.738 | 0.460        | 1.26 (1.08, 1.48) | 0.018  | 0.986 | 1.08 (1.02, 1.14) | 2.265  | <b>0.024</b> | 1.16 (1.07, 1.26) | 1.368  | 0.171        |
| Hyperlipidemia      | No  | 1.60 (1.35, 1.89) |        |              | 1.26 (0.97, 1.63) |        |       | 0.99 (0.95, 1.04) |        |              | 1.05 (0.92, 1.19) |        |              |
|                     | Yes | 1.50 (1.31, 1.71) | -0.211 | 0.833        | 1.42 (1.14, 1.76) | 1.491  | 0.136 | 1.19 (1.11, 1.28) | 5.217  | <b>0.000</b> | 1.24 (1.10, 1.40) | 2.271  | <b>0.023</b> |
| Cerebral infarction | No  | 1.53 (1.35, 1.72) |        |              | 1.15 (0.97, 1.37) |        |       | 0.97 (0.94, 1.00) |        |              | 1.05 (0.96, 1.14) |        |              |
|                     | Yes | 1.16 (1.01, 1.33) | -3.805 | <b>0.000</b> | 1.11 (0.90, 1.38) | -1.346 | 0.178 | 1.02 (0.96, 1.08) | -0.883 | 0.377        | 1.02 (0.92, 1.14) | -1.878 | 0.060        |
|                     | No  | 1.61 (1.46, 1.79) |        |              | 1.34 (1.13, 1.58) |        |       | 1.06 (1.01, 1.11) |        |              | 1.16 (1.07, 1.27) |        |              |

<sup>a</sup> fully adjusted models controlling age, education years, smoking, drinking, family history of dementia, and history of NCDs. In all models, city was set as random effect factor. ORs and 95% CIs were associated with per 10  $\mu\text{g}/\text{m}^3$  increase in each pollutant. <sup>b</sup> the significance of difference in effect estimates between different subgroups was examined using a two-sample test. For smoking and drinking, the never smoke and never drink groups were set as the reference groups. \*  $p < 0.05$  in the two-sample test. \*\*  $p < 0.01$  in the two-sample test.

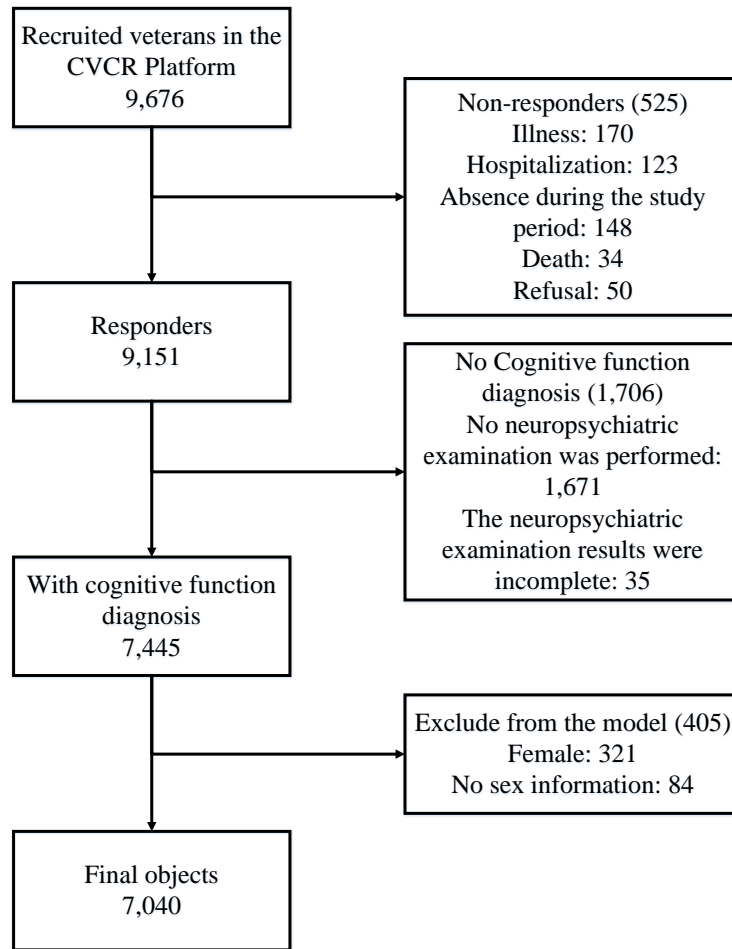

**Figure S1. Flow chart of research object selection**



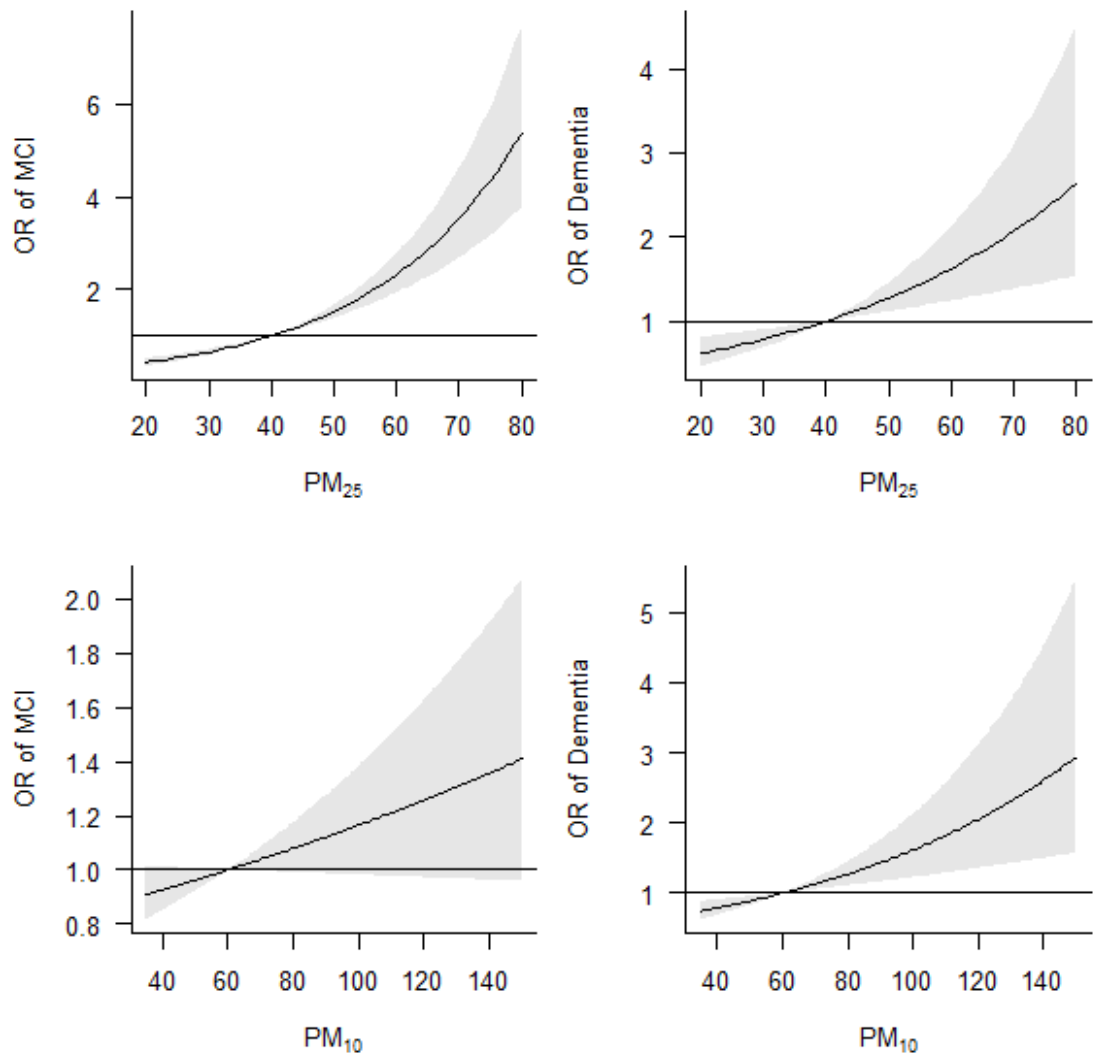

**Figure S2. The non-linear associations between PM and MCI/dementia using natural cubic splines with three degrees of freedom on PM**

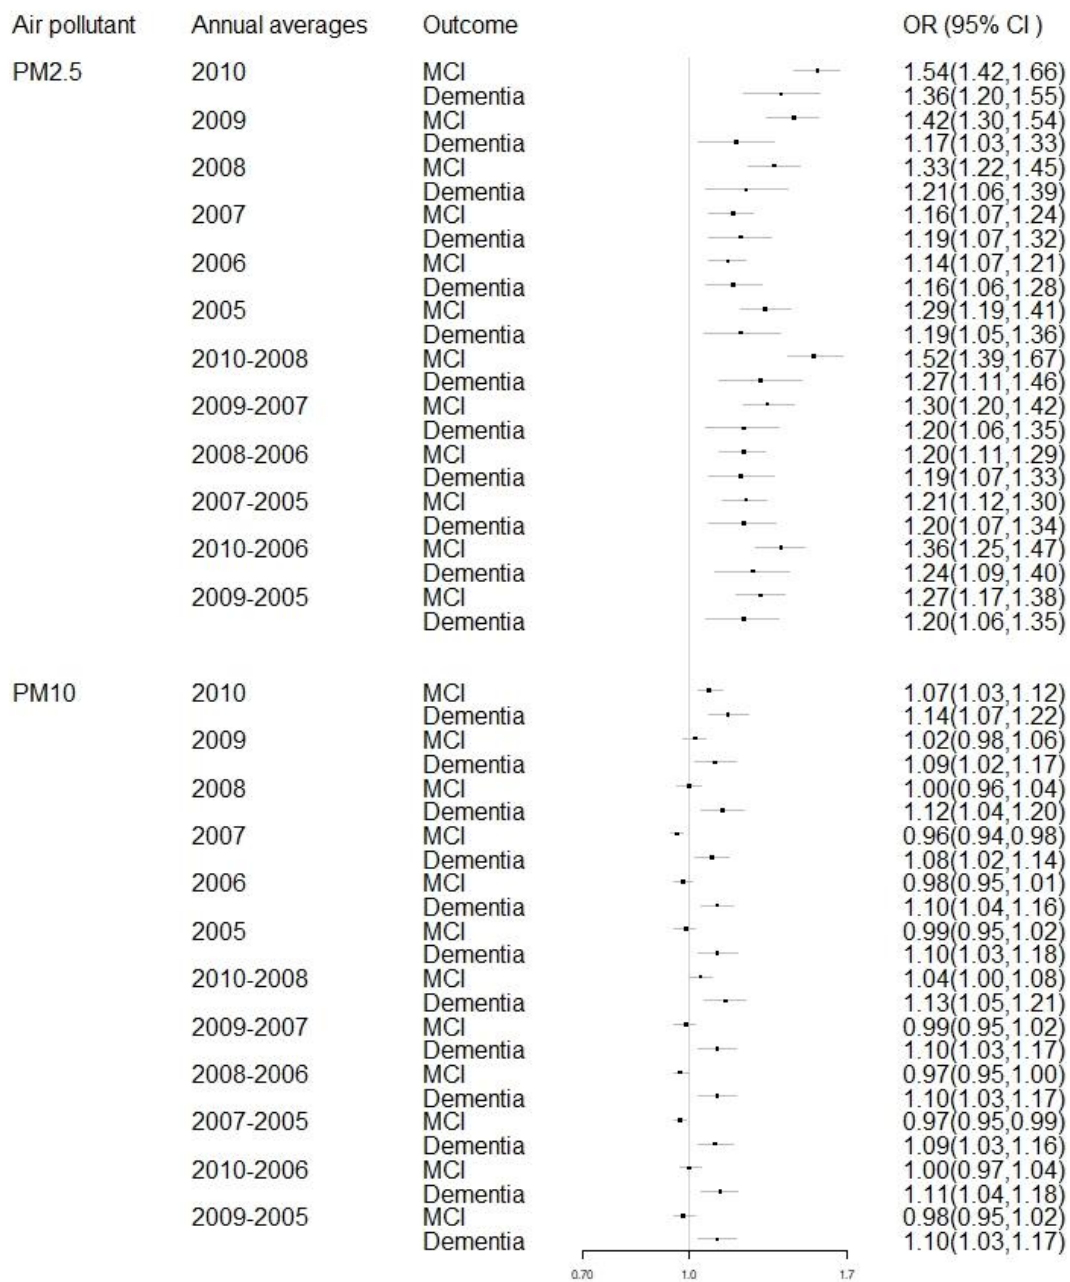

Figure S3. The sub-analyses for the evaluation of time scales for PM exposures
